## HIF-stabilization prevents delayed fracture healing

**One Sentence Summary:** We here provide evidence for a promising preventive approach to enhance bone regeneration capacities and potentially to overcome compromised bone healing conditions by combining DFO and MIF – as potent HIF-stabilizers.

**Authors:** Annemarie Lang<sup>1,2,3</sup>, Sarah Helfmeier<sup>1</sup>, Jonathan Stefanowski<sup>1,2</sup>, Aditi Kuppe<sup>1</sup>, Vikram Sunkara<sup>4,5</sup>, Moritz Pfeiffenberger<sup>1,2</sup>, Angélique Wolter<sup>1,2</sup>, Alexandra Damerau<sup>1,2</sup>, Shabnam Hemmati-Sadeghi<sup>1,3,6</sup>, Jochen Ringe<sup>1,3</sup>, Rainer Haag<sup>6</sup>, Anja E. Hauser<sup>1,2</sup>, Max Löhning<sup>1,2</sup>, Carsten Perka<sup>7</sup>, Georg N. Duda<sup>3,7,8\*</sup>, Paula Hoff<sup>1,2,3</sup>, Katharina Schmidt-Bleek<sup>3,7,8†</sup>, Timo Gaber<sup>1,2,3†\*</sup>, Frank Buttgerit<sup>1,2,3†</sup>

†These authors contributed equally (KSB, TG, FB).

\*To whom correspondence should be addressed: [timo.gaber@charite.de](mailto:timo.gaber@charite.de); [georg.duda@charite.de](mailto:georg.duda@charite.de)

### Affiliations:

<sup>1</sup>Charité – Universitätsmedizin Berlin, corporate member of Freie Universität Berlin, Humboldt-Universität zu Berlin, and Berlin Institute of Health, Department of Rheumatology and Clinical Immunology, Berlin, Germany

<sup>2</sup>German Rheumatism Research Centre (DRFZ) Berlin, a Leibniz Institute, Berlin, Germany

<sup>3</sup>Charité – Universitätsmedizin Berlin, corporate member of Freie Universität Berlin, Humboldt-Universität zu Berlin, and Berlin Institute of Health, Berlin Institute of Health Center for Regenerative Therapies, Berlin, Germany

<sup>4</sup>Computational Medicine, Zuse Institute Berlin, Berlin, Germany

<sup>5</sup>Department of Mathematics and Computer Science, Freie Universität Berlin, Berlin, Germany

<sup>6</sup>Institute of Chemistry and Biochemistry, Freie Universität Berlin, Berlin, Germany

<sup>7</sup>Charité – Universitätsmedizin Berlin, corporate member of Freie Universität Berlin, Humboldt-Universität zu Berlin, and Berlin Institute of Health, Center for Musculoskeletal Surgery, Berlin, Germany

<sup>8</sup>Charité – Universitätsmedizin Berlin, corporate member of Freie Universität Berlin, Humboldt-Universität zu Berlin, and Berlin Institute of Health, Julius Wolff Institute, Berlin, Germany

31 **Abstract**

32       The initial phase of fracture healing decides on success of bone regeneration and is characterized by  
33 an inflammatory milieu and low oxygen tension (hypoxia). Negative interference with or prolongation of  
34 this fine-tuned initiation phase will ultimately lead to a delayed or incomplete healing such as non-unions  
35 which then requires an effective and gentle therapeutic intervention. Common reasons include a  
36 dysregulated immune response, immunosuppression or a failure in cellular adaptation to the inflammatory  
37 hypoxic milieu of the fracture gap and a reduction in vascularizing capacity by environmental noxious  
38 agents (e.g. rheumatoid arthritis, smoking). The hypoxia-inducible factor (HIF)-1 $\alpha$  is responsible for the  
39 cellular adaptation to hypoxia, activating angiogenesis and supporting cell attraction and migration to the  
40 fracture gap. Here, we hypothesized that stabilizing HIF-1 $\alpha$  could be a cost-effective and low-risk  
41 prevention strategy of fracture healing disorders. Therefore, we combined a well-known HIF-stabilizer –  
42 deferoxamine (DFO) – and a less known HIF-enhancer – macrophage migration inhibitory factor (MIF) –  
43 to synergistically induce improved fracture healing. Stabilization of HIF-1 $\alpha$  enhanced calcification and  
44 osteogenic differentiation of MSCs *in vitro*. *In vivo*, the application of DFO with or without MIF during the  
45 initial healing phase accelerated callus mineralization and vessel formation in a clinically relevant mouse-  
46 osteotomy-model in a compromised healing setting. Our findings provide support for a promising preventive  
47 strategy towards bone healing disorders in patients with a higher risk due to e.g. delayed neovascularization  
48 by accelerating fracture healing using DFO and MIF to stabilize HIF-1 $\alpha$ .

49

## 50 **Introduction**

---

51 Fracture healing combines temporal and spatial fine-tuned and tightly regulated regenerative  
52 processes, which lead to a complete restoration of the broken bone without scar formation. However, a  
53 minimum of 10 % of patients with fractures suffer from fracture healing disorders such as delayed or  
54 incomplete healing (non-unions) leading to immobility, pain, a loss in quality of life, and generate an  
55 economic burden for the society (1, 2). While trauma severity and location can determine the healing success  
56 (3), several risk factors have been described to potentially impair the fracture healing process such as age  
57 and lifestyle including obesity, alcohol abuse, and smoking (4). Of note, smoking is supposed to reduce  
58 vessel formation and to stimulate adverse immune reactions (5). Furthermore, chronic inflammatory  
59 diseases, such as rheumatoid arthritis (RA) or systemic lupus erythematosus, have been related to fracture  
60 healing disorders (6-8). Patients with fracture healing disorders often require several further revision  
61 surgeries. Apart from surgical intervention, local delivery of recombinant human (rh)BMP-2 into the  
62 fracture gap has been demonstrated in clinical studies to be effective (9, 10). However, several adverse  
63 effects in humans strongly restrict the clinical implementation of this approach (11) and alternative strategies  
64 or preventive measures are lacking.

65 If a fracture is stabilized such that inter-fragmentary movements can occur, secondary bone healing  
66 is initiated leading to bone regeneration via an endochondral ossification process bridging the fracture gap.  
67 Endochondral bone healing can be divided into five phases: i) initial pro-inflammatory phase, ii) anti-  
68 inflammatory phase; iii) fibrocartilaginous or soft callus phase; iv) woven bone or hard callus phase; and v)  
69 the remodeling phase leading to the bone restitution in form and function according to the mechanical strain  
70 (12). The shift from pro- to anti-inflammatory phase is a requirement for angiogenic and pro-osteogenic  
71 processes during the initial phase of fracture healing and determine the subsequent regeneration cascades  
72 (6, 13). This shift is essential for the initiation of bone reconstruction involving the recruitment of i)  
73 monocytes/macrophages, clearing the inflammatory scene and paving the path for revascularization, ii) pre-  
74 osteoblasts and mesenchymal stromal cells (MSCs) as basic component of bone reconstruction, iii)  
75 fibroblasts, which are required for early callus formation and bone matrix formation, and iv) endothelial

76 cells (ECs) for neovascularization (14, 15). Crucial elements for successful bone healing are balanced  
77 control and termination of the pro-inflammatory cascade (16), proper mesenchymal differentiation and  
78 cartilage formation, controlled invasion of vessels (17) as well as a sufficient mechanical stabilization (18-  
79 21).

80         The hypoxic and inflammatory conditions in the fracture hematoma result from the disruption of  
81 vessels, accumulation of inflammatory cells, increased cell death of e.g. erythrocytes and the lack of  
82 nutrients, oxygen, high lactate and low pH – a cytotoxic environment which has to be down-regulated to  
83 maintain regenerative cells. The oxygen tension within the fracture site is reduced over the first week after  
84 trauma being accompanied by a reduction (50%) of blood flow (22-27). Therefore, cellular adaptation  
85 mechanisms towards hypoxia are strongly activated – such as the hypoxia inducible factor (HIF) signaling  
86 pathway. Both, HIF-1 and HIF-2 are essential for cells to survive hypoxic conditions and to aim at increasing  
87 the oxygen supply while reducing oxygen consumption (28). While HIF-1 $\beta$  is constitutively expressed, HIF-  
88 1 $\alpha$  is oxygen-dependently activated and stabilized at less than 5% oxygen (29). HIF-1 $\alpha$  is then translocated  
89 to the nucleus, where it heterodimerizes with HIF-1 $\beta$ , binds to its target sequences (hypoxia-responsive  
90 elements), and activates genes necessary for cellular hypoxic adaptation (29, 30). Under normoxic  
91 conditions, HIF-1 $\alpha$  is hydroxylated by the oxygen- and iron-dependent prolyl-hydroxylase domain (PHD)  
92 enzyme/protein and degraded by cellular proteasomes.

93         We have previously examined fracture hematomas obtained from immunologically restricted patients  
94 and found reduced osteogenic differentiation due to reduced *runx-related transcription factor 2 (RUNX2)*  
95 expression, exaggerated immune reactions (*interleukin IL-8*, *C-X-C chemokine receptor type 4 CXCR4*),  
96 and high expression of *HIF1A* but inadequate expression of target genes (31). We also found higher numbers  
97 of monocytes/macrophages, natural killer T (NKT) cells and activated T cells within fracture hematomas of  
98 immunologically restricted patients accompanied by higher levels of IL-6, IL-8, tumor necrosis factor  
99 (TNF) $\alpha$  and chemokines (e.g. Eotaxin) (32). In order to increase target gene expression, HIF-1 $\alpha$  can be  
100 chemically stabilized by different factors, which either inhibit the O<sub>2</sub>-sensing PHD such as deferoxamine

101 (DFO) or directly interfere with the downstream effects after translocation to the nucleus e.g. the  
102 macrophage-migration inhibitory factor (MIF) (33, 34).

103         Here, we initially performed a single center retrospective study to investigate the risk factors for  
104 fracture healing disorders in a Charité-located patient cohort and to determine the clinical need to  
105 preventively support and accelerate fracture healing. Furthermore, we comprehensively systematically  
106 reviewed the available literature to delineate the potential of our drafted therapeutic approach of promoting  
107 fracture healing using DFO. To this end, we summarized several studies which demonstrated the efficacy  
108 of DFO to promote bone fracture healing in a variety of animal models (mouse, rat, rabbit) focusing on  
109 different kinds of bone defects. Experimentally, we conducted *in vitro* studies on osteogenesis, which  
110 supported the enhancing effect of HIF-1 $\alpha$  stabilization on osteogenic differentiation of MSCs and its  
111 counteracting efficacy against e.g. glucocorticoid (GC)-induced inhibition of osteogenesis. Moreover, we  
112 tested the combination of MIF and DFO in a mouse-osteotomy-model of compromised bone healing  
113 conditions in order to evaluate their preventive capability to counteract delayed bone healing in this  
114 clinically relevant model. Thus, our study provides evidence for a promising preventive strategy to  
115 accelerate fracture healing by applying potent HIF-stabilizers during initial fracture treatment in patients at  
116 risk that may finally help to minimize bone healing disorders.

117

118

## 119 **Results**

---

### 120 *Fracture healing disorders in a single-center patient cohort – A retrospective study*

121 Fracture healing disorders are associated with the incidence of several different risk factors e.g. age,  
122 gender, fracture location, comorbidities of medications. Therefore, we investigated the main risk factors for  
123 fracture healing disorders in a single-center retrospective study at the Center for Musculoskeletal Surgery,  
124 Charité-Universitätsmedizin Berlin to get a more precise view of the patient's need for a therapeutic support  
125 and acceleration of fracture healing. To this end, we screened data from inpatients treated in the hospital  
126 during 2012 (**fig. S1**). Finally, 79 cases fulfilling inclusion criteria were included in the study (**table S1**), as  
127 well as 178 controls matched for age and fracture location while patients aged < 18 years, having open  
128 fractures or metastases close to the fracture location were excluded.

129 First, we performed a descriptive statistical analysis to compare the two groups based on the collected  
130 parameters such as body mass index (BMI), gender, alcohol abuse (repeated consumption of alcohol per  
131 week), smoking, glucocorticoid and NSAID treatment as well as diagnosed comorbidities as RA,  
132 osteoporosis, arterial hypertension and diabetes type 2 (**table S2**). The average BMI of the two groups was  
133 similar. Comparing the control and case group, we found more male patients (53.2% vs. 44.9%) than female  
134 patients (46.8% vs. 55.1%) to be affected by fracture healing disorders. Interestingly, alcohol abuse was  
135 more often present in the control group as compared to the case group (14.4% vs 2.7%) which was the  
136 opposite for smoking (28.1% vs. 37.8%). Regarding medications, a higher number of patients with fracture  
137 healing disorders were continuously treated with glucocorticoids (6.3% vs. 1.6%) and NSAIDs (7.6% vs.  
138 2.7%) as compared to controls. Although the frequencies of osteoporosis and diabetes type 2 were  
139 comparable within both groups, the incidences of RA (6.3% vs. 0.5 %) and arterial hypertension (43% vs.  
140 33.5%) were higher in the case group. To select potentially relevant factors, an univariable logistic  
141 regression was performed (**Table 1**) using a significance level of 0.15 resulting in the selection of smoking,  
142 RA and arterial hypertension for detailed analysis via multivariable logistic regression. Age and gender,  
143 parameters well-known to be associated with a poor fracture healing outcome, were additionally included  
144 in the subsequent multivariable logistic regression. Statistical analysis using multivariable logistic

145 regression showed a high significance for RA ( $P = 0.028$ ) and a trend for smoking ( $P = 0.075$ ) to be  
 146 associated with fracture healing disorders such as non-unions.

147 **Table 1: Univariable and multivariable logistic regression.**

|                              | <i>Univariable</i> |                 | <i>Multivariable</i> |              |              |              |
|------------------------------|--------------------|-----------------|----------------------|--------------|--------------|--------------|
|                              | Omnibus test       | <i>P</i> -value | 5                    | 4            | 3            | 2            |
| Age                          | 0.597              | 0.597*          | 0.118                | 0.202        | -            | -            |
| Gender                       | 0.219              | 0.219*          | 0.148                | -            | -            | -            |
| BMI                          | 0.212              | -               |                      |              |              |              |
| Alcoholism                   | 0.657              | -               |                      |              |              |              |
| <b>Smoking</b>               | <b>0.131</b>       | <b>0.129</b>    | <b>0.065</b>         | <b>0.063</b> | <b>0.048</b> | <b>0.075</b> |
| <b>Rheumatoid Arthritis</b>  | <b>0.006</b>       | <b>0.022</b>    | <b>0.057</b>         | <b>0.047</b> | <b>0.040</b> | <b>0.028</b> |
| Glucocorticoids              | 0.725              | -               |                      |              |              |              |
| NSAIDs                       | 0.336              | -               |                      |              |              |              |
| Osteoporosis                 | 0.813              | -               |                      |              |              |              |
| <b>Arterial Hypertension</b> | <b>0.143</b>       | <b>0.142</b>    | <b>0.085</b>         | <b>0.058</b> | <b>0.137</b> | -            |
| Diabetes Type 2              | 0.908              | -               |                      |              |              |              |

148 ***Deferoxamine as potent target for fracture healing disorders – A systematic literature review***

149 We have previously found that immunologically restricted patients (including e.g. autoimmune  
 150 disease) show a disturbed response to hypoxia in the fracture hematoma (31). Therefore, we hypothesized  
 151 that HIF-stabilization can accelerate fracture healing in those patients. The inhibition of iron-dependent  
 152 PHDs by iron chelators or competitors activates HIF-mediated pathways such as angiogenesis and  
 153 osteogenesis. The iron chelator DFO is well-known from *in vitro* and *in vivo* studies to stabilize HIF (35,  
 154 36).

155 Given this background, we performed a systematic literature review to delineate existing preclinical  
 156 studies on the effectiveness and efficiency of DFO in fracture healing. In detail, we asked the question  
 157 whether the local application of DFO in the fracture gap enhanced bone formation ( $\mu$ CT; histomorphometry)  
 158 during fracture healing in animal models with normal or disturbed fractures of long-bones or *Ossa*  
 159 *irregularia* (*mandibula* or *zygomatic arch*). The complete search strategy can be found in figure S2 and S3.

160 We included 20 studies for a descriptive analysis. A meta-analysis was not applicable due to the variability  
 161 of studies, the variety of models and the information provided (e.g. data values not given; confidential  
 162 intervals not indicated). Nevertheless, all included studies demonstrated the efficacy of DFO to promote  
 163 bone fracture healing in a variety of animal models (mouse, rat, rabbit) with different bone defects (**Table**  
 164 **2**). In these studies, DFO was applied in varying doses (in mouse: 20  $\mu$ l of 200  $\mu$ M – 400  $\mu$ M) either once  
 165 or repetitively by local injection directly into the bone defect/gap or by loading onto a scaffold implanted  
 166 into the bone defect/gap to counteract a delayed healing or non-union. DFO treatment resulted in a strong  
 167 promotion of angiogenesis/vessel formation and bone regeneration independent of the species, model and  
 168 evaluation methods (22-39).

169 **Table 2: Systematic literature review on the potential of DFO to accelerate bone formation/healing.**

| Species             | Bone                          | Model                                           | Application Route & Concentration                                  | Bone/vessel formation                                        | Refs.   |      |
|---------------------|-------------------------------|-------------------------------------------------|--------------------------------------------------------------------|--------------------------------------------------------------|---------|------|
| Sprague-Dawley rats | <i>Ossa irregularia</i>       | Mandibular distraction osteogenesis             | Local injection every other day (5 doses); DFO = 200 $\mu$ M       | +++                                                          | (37-39) |      |
|                     |                               | Mandibular osteotomy or distraction + Radiation | Local injection every other day (5 doses); DFO = 200 $\mu$ M       | +++                                                          | (40-46) |      |
|                     |                               | Zygomatic arch critical-size bone defect        | Local injection every other day (> 20 doses); DFO = 200 $\mu$ M    | +++                                                          | (47)    |      |
|                     | Long bones                    | Segmental femur defects (wire)                  | Application onto scaffold; DFO = 400 $\mu$ M                       | +++                                                          | (48)    |      |
|                     |                               | Tibial non-union model                          | Application onto scaffold; DFO = 1 mg/kg                           | +++                                                          | (49)    |      |
|                     |                               | Femoral drilling hole model                     | Application onto scaffold; DFO = 1 mg/ml                           | +++                                                          | (36)    |      |
|                     |                               | Tibia cortical drilling + hindlimb unloading    | Local injection every other day (2-5 doses); DFO = 200 $\mu$ mol/l | +++                                                          | (50)    |      |
|                     |                               | Femoral drilling hole + ovariectomy             | Application onto scaffold; DFO = 2 $\mu$ g                         | +++                                                          | (51)    |      |
|                     |                               | C57BL/6 mice                                    | Distraction osteogenesis in tibia (plate)                          | Local injection every other day (6 doses); DFO = 200 $\mu$ M | +++     | (35) |
|                     |                               |                                                 | Stabilized femur fracture model (pin)                              | Local injection every other day (5 doses); DFO = 200 $\mu$ M | +++     | (52) |
| NZW rabbits         | Segmental radius bone defects | Application onto scaffold DFO = 2 mM            | +++                                                                | (53)                                                         |         |      |
|                     | Mid-shaft ulnar defect        | Application onto scaffold DFO = 200 $\mu$ M     | +++                                                                | (54)                                                         |         |      |

170 NZW – New Zealand White rabbits

171 Based on the published data, we concluded that a single injection of DFO might be sufficient to  
 172 enhance fracture healing under compromised conditions. In addition, we asked if the effect of DFO can be



173 increased by combination with MIF which we have shown to further enhance HIF activity, especially in  
 174 immune cells and endothelial cells (55).

### 175 ***Combining DFO and MIF to enhance in vitro calcification of hMSCs***

176 To evaluate the potential of MIF and DFO as enhancer of bone formation *in vitro*, different  
 177 concentrations alone and in combination were tested in an osteogenic differentiation assay of bone marrow  
 178 derived human (h)MSCs. High concentrations of Dexamethasone (Dex;  $10^{-3}$  M) were used as a technical *in*  
 179 *vitro* model to strongly induce delayed calcification while  $10^{-8}$  M Dex was the respective control which is  
 180 usually included in the osteogenic medium (OM). Large differences in calcification were observed after 4  
 181 weeks under normoxic conditions and used further titration experiments (**fig. S4; fig. S5; Fig. 1**). Normoxic  
 182 conditions represented the inadequate adaptation to hypoxia as mentioned before. Varying concentrations  
 183 of MIF and DFO alone and in combination were examined for their effect on hMSC calcification. The  
 184 application of DFO alone showed significant increases in calcification after 4 weeks at 62.5, 125, 250 and  
 185 500  $\mu$ M which was also observed at 250 and 500 ng/ml MIF (**fig. S5A, B**). A double normalization to both  
 186 controls ( $10^{-3}$  M and  $10^{-8}$  M Dex) revealed that MIF alone did not enhance calcification (**Fig. 1A**), while  
 187 DFO alone already showed mean increases between 43% - 45.9% (**Fig. 1B**). The combination of MIF and  
 188 DFO led to a significant increase in calcium deposition when using 50 ng/ml MIF + 125  $\mu$ M DFO and 100  
 189 ng/ml MIF + 125  $\mu$ M DFO with a mean increase of 61.7% to 86.7% for both groups (**fig. S5C; Fig. 1C**).

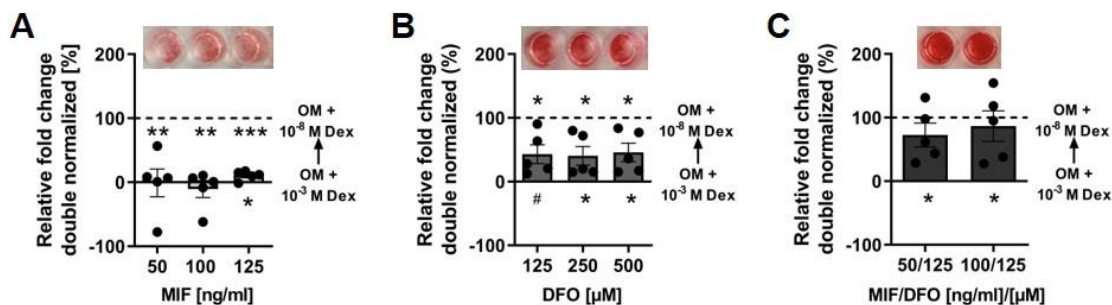

190  
 191 **Figure 1: *In vitro* studies on the effect of MIF and DFO on hMSC calcification.** Double normalization of OD values  
 192 (Dex  $10^{-3}$  M = 0 %; Dex  $10^{-8}$  M = 100 %) for selected MIF (A), DFO (B) and MIF/DFO (C) concentrations. Asterisks  
 193 above and below the bars indicate significant differences as compared to the respective control. Bar graphs show  
 194 mean  $\pm$  SEM and individual data points. One sample t-test was used to determine the statistical significance; P-values  
 195 are indicated with # $P < 0.07$ ; \* $P < 0.05$ ; \*\* $P < 0.01$ ; \*\*\* $P < 0.001$ . Exemplary images of Alizarin red staining in 96  
 196 well are displayed before quantification.

197 ***The effect of MIF and DFO on in vivo bone formation in a delayed healing model***

198           Based on the results from the systematic review and our *in vitro* experiments, we tested MIF and  
199 DFO, both alone and in combination in an experimental delayed healing model using a modified mouse-  
200 osteotomy which results in a local blockage of angiogenesis and results in a delayed bone healing due to  
201 insertion of an absorbable bovine Col-I scaffold (ACS) in the osteotomy gap (56). We previously  
202 demonstrated that this model features a disturbance in cell invasion, vessel formation and consecutively  
203 bone formation when compared to empty-gap controls at 2 and at 3 weeks after osteotomy (56). The  
204 osteotomy gap (0.7 mm) was introduced in the femur of 12 weeks old female C57BL/6N mice. A stable  
205 fixation of the osteotomized bone was obtained using an external fixator.

206           Bone formation was significantly intensified in the DFO and MIF/DFO treated groups as measured  
207 by bone volume fraction at 3 weeks post-osteotomy (**Fig. 2A; fig. S6A**). We confirmed our finding by  
208 histological evaluation quantifying Movat's pentachrome staining (**Fig. 2B, C; fig. S6B, C**). As a result, we  
209 observed increased levels in total mineralized bone tissue in the fracture area and in the fracture gap in all  
210 treatments groups after 2 weeks (**Fig. 2C**). Interestingly, MIF also significantly induced total bone formation  
211 especially in the fracture gap at 2 weeks when compared to the corresponding ACS control, while in the  
212 other groups mineralized bone formation was more pronounced within the gap (**Fig. 2C**). Of note, we  
213 observed a higher cartilage content in the MIF and DFO group at 2 weeks as compared to the ACS control,  
214 while MIF/DFO exhibited similar amounts of cartilage. These differences were not present at 3 weeks, since  
215 animals with only ACS show a delayed endochondral ossification (between week 2 and 3; **fig. S6C**) (56).  
216 However, the complete bridging of the fracture gap with cartilage and mineralized bone was observed in  
217 50% of DFO and MIF/DFO mice additionally indicating an acceleration of the endochondral ossification  
218 process (**fig. S7**). Interestingly, bridging between cortices was more often observable in the MIF/DFO  
219 treated group (50%) (**fig. S7**). Finally, DFO and MIF/DFO led to a higher recruitment of osterix (Osx)<sup>+</sup>  
220 osteoprogenitors/osteoblasts to the fracture gap at 2 weeks (**Fig. 2D, E**). In addition, Osx<sup>+</sup> cells were more  
221 present at day 3 in the DFO group and day 7 in MIF group (**fig. S6D**). Taken together, these data suggest

222 that both DFO and MIF/DFO accelerated the endochondral ossification process during the fracture healing  
 223 in our delayed healing mouse-osteotomy-model.

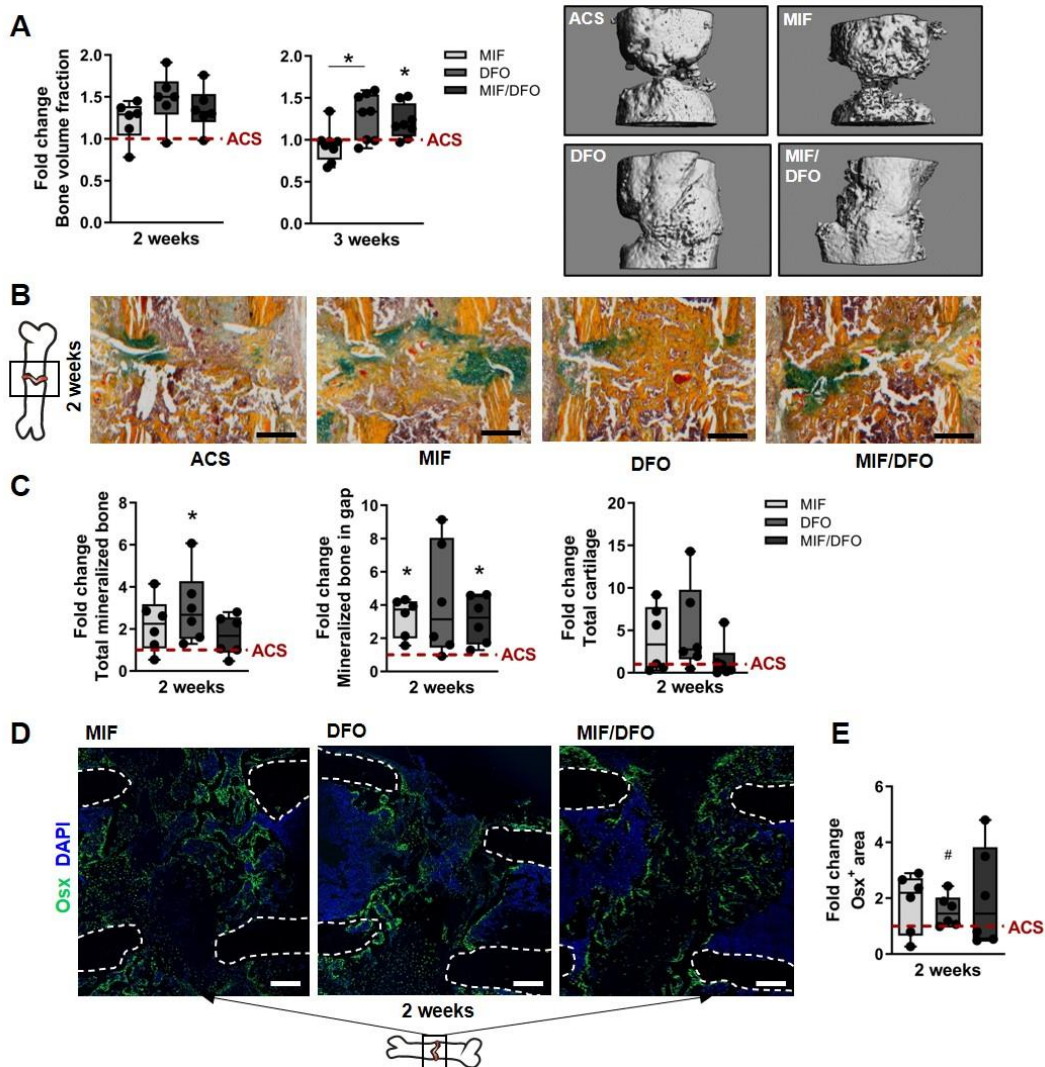

224  
 225 **Figure 2: Bone regeneration in a delayed healing model after single dose of MIF or/and DFO.** (A) MicroCT  
 226 quantification at 2 weeks and at 3 weeks post-osteotomy normalized to the median of the ACS group (indicated as  
 227 dotted line = 1). Bone volume fraction = bone volume/callus volume. Representative 3D microCT reconstructions at  
 228 week 3. (B) Representative images of Movat's pentachrome staining for each group at week 2. yellow – mineralized  
 229 bone/scaffold; green – cartilage; magenta – bone marrow. (C) Histomorphometry of Movat's pentachrome staining  
 230 using ImageJ. Data were normalized to the median of the ACS group (indicated as dotted line = 1). (D) Representative  
 231 images of immunofluorescence staining of Osterix (Osx) and its quantification. White dotted lines indicate cortices.  
 232 Schematic bone indicates alignment of images. Scale bars indicate 200 $\mu$ m. Data are shown as box plots with the  
 233 median as horizontal line, interquartile range as boxes, minimum/maximum as whiskers and individual data points.  
 234 Wilcoxon signed rank test was applied to determine difference against the ACS control group (hypothetical value = 1)  
 235 and Kruskal Wallis test with Dunn's multiple comparison test was used to compare groups. # $P < 0.07$ ; \* $P < 0.05$ .

236 ***Vessel formation is increased by HIF-stabilization***

237           Revascularization is crucial for bone regeneration, tightly regulated by the microenvironment and  
238 appears in two waves at day 7 and day 21 (17, 57). CD31<sup>+</sup> endothelial progenitors enter the fracture gap  
239 during the initial phase of fracture healing (until day 7) (57). DFO is known to strongly promote  
240 revascularization by the induction of vascular endothelial growth factor (VEGF) expression, a target gene  
241 of HIF-1 $\alpha$  (34). Therefore, we analyzed the osteotomy site in our delayed healing model for the presence of  
242 CD31<sup>+</sup> Emcn<sup>+</sup> vessels. At week 2 and 3, we found significantly more CD31<sup>+</sup> Emcn<sup>+</sup> vessels in the fracture  
243 gap of the treatment groups compared to the ACS control group while cell invasion was more pronounced  
244 at week 2 and comparable to the ACS control group at week 3 (**Fig. 3A-C**). Pixel intensity analysis revealed  
245 elevated Emcn and CD31 expressions in the DFO and MIF/DFO group at week 2 indicating a higher  
246 appearance of CD31<sup>+</sup> and Emcn<sup>+</sup> cells and a higher vascular formation (**Fig. 3D-F**). Interestingly, MIF alone  
247 also induced the expression of CD31 in the fracture gap at week 2 compared to the ACS group (**Fig. 3E**).  
248 However, expression levels were comparable between all groups at week 3. When examining earlier  
249 timepoints (day 3 and 7), we observed a comparable appearance of CD31<sup>+</sup> endothelial progenitors in all  
250 groups but the DFO group (**fig. S8A**). In the DFO group, we observed a reduced number of CD31<sup>+</sup>  
251 endothelial progenitors at day 7, which was in line with the overall low cell number (DAPI) in the fracture  
252 gap during the early stage (**fig. S8A**). Moreover, immunofluorescence images indicated a pronounced  
253 invasion of CD31<sup>+</sup> endothelial progenitors in the region adjacent to the fracture gap (**fig. S8B**). We conclude  
254 from our data that MIF, DFO as well as the combined MIF/DFO enhanced and accelerated revascularization  
255 to a considerably higher extent than the corresponding control group as seen at week 2 and 3.



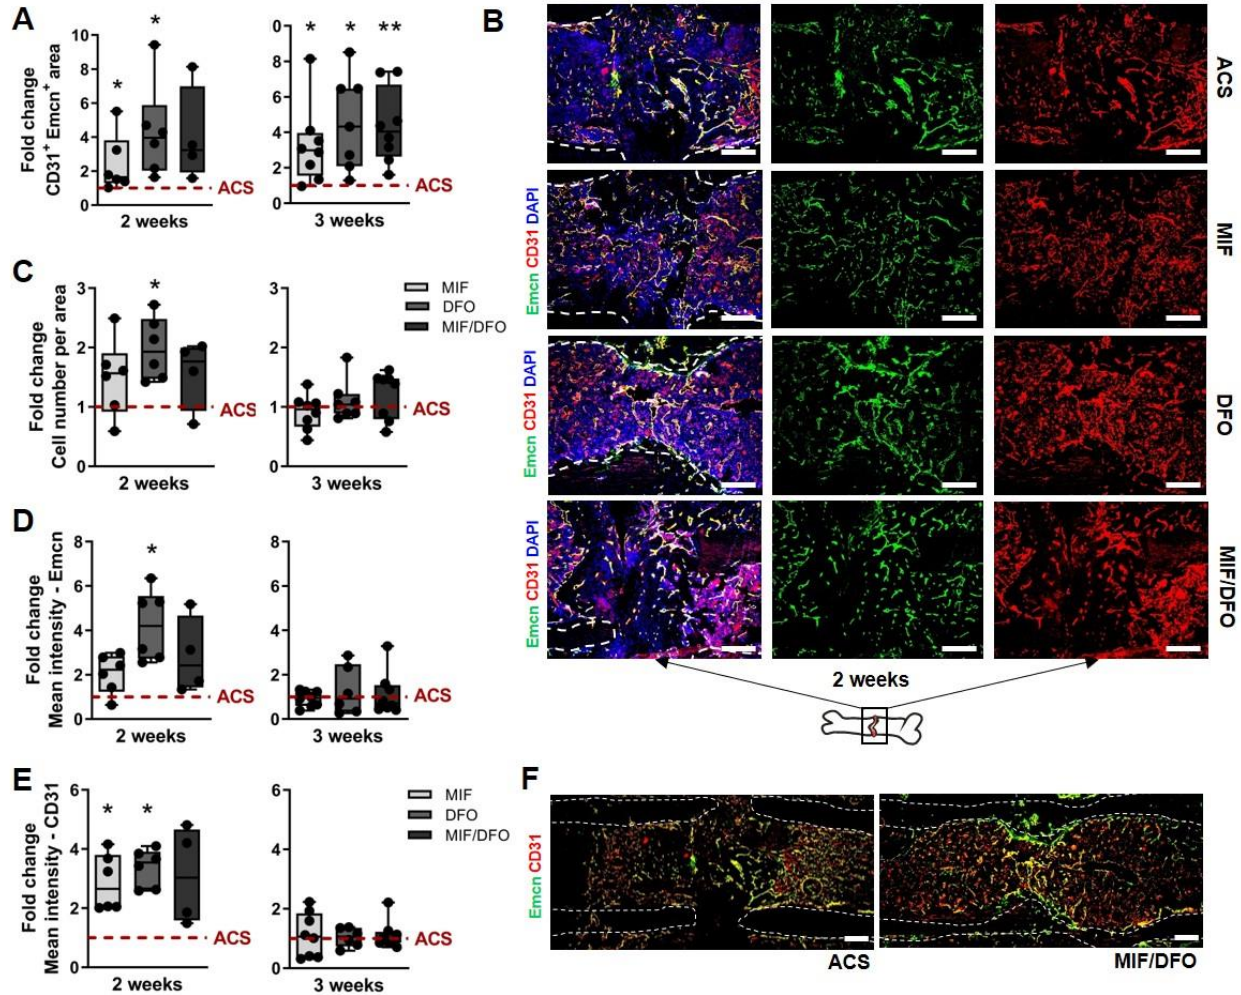

256

257 **Figure 3: Revascularization in a delayed healing model under MIF, DFO and MIF/DFO treatment.** (A-C)

258 Quantified CD31<sup>+</sup>Emcn<sup>+</sup> stained areas (A) and cell numbers per area (C) normalized to the median of the ACS group

259 (indicated as dotted line = 1) and (B) corresponding representative images for week 2 and 3 (N = 6-8). (D, E) Pixel

260 based intensity analysis of Emcn (D) and CD31 (E) in the fracture gap normalized to the median of the ACS group

261 (indicated as dotted line = 1) and (F) representative images of the combined staining for ACS and MIF/DFO at week

262 2. (N = 6-8). White dotted lines indicate cortices. Schematic bone indicates alignment of images. Scale bars = 200µm.

263 Data are shown as box plots with the median as horizontal line, interquartile range as boxes, minimum/maximum as

264 whiskers and individual data points. Wilcoxon signed rank test was applied to determine difference against the ACS

265 control group (hypothetical value = 1) and Kruskal Wallis test with Dunn's multiple comparison test was used to

266 compare groups. \*P < 0.05; \*\*P > 0.01.

267

268 ***DFO and MIF/DFO lead to enhanced presence of macrophages and TRAP<sup>+</sup> cells***

269           Macrophages are essential during fracture healing and we have previously reported the crosstalk  
270 between macrophages and vessel especially during the early phase (56, 57). Since the treatment with both  
271 DFO and MIF/DFO resulted in an enhanced and accelerated endochondral ossification (Fig. 2) and  
272 revascularization (Fig. 3), we further asked whether DFO and MIF/DFO contribute to an increased  
273 macrophage invasion. Therefore, we analyzed the osteotomy area for the presence of F4/80<sup>+</sup> cells at 3 days,  
274 7 days, 2 weeks and 3 weeks post-surgery. We observed a higher appearance of these cells in the DFO group  
275 at day 3 indicating a faster recruitment to the fracture gap, while at day 7 the number was observably reduced  
276 as compared to day 3 and the corresponding control (ACS) (**Fig. 4A, B**). No differences were found between  
277 the other groups. Furthermore, we observed a more pronounced presence of tartrate-resistant acid  
278 phosphatase (TRAP)<sup>+</sup> cells in the DFO and MIF/DFO group at week 2 than in the ACS group, which was  
279 significantly reduced in the MIF group at week 3 when compared to the ACS and DFO group (**Fig. 4C, D**).  
280 TRAP is a well-known marker of osteoclasts but can be also found on activated macrophages (58). In  
281 addition, quantifications of the scaffold area after 2 and 3 weeks indicated a significant reduction of the  
282 ACS in the osteotomy gap of both the DFO group (at week 2 and 3) and the MIF/DFO group (at week 2)  
283 (**fig. S9**).

284           Together, these results suggest that both DFO and MIF/DFO promote recruitment of macrophages or  
285 local proliferation during the early phase (day 3) and a pronounced expression of TRAP (osteoclast  
286 differentiation) thereby supporting the bone regeneration process by providing the space for  
287 revascularization.

288

289

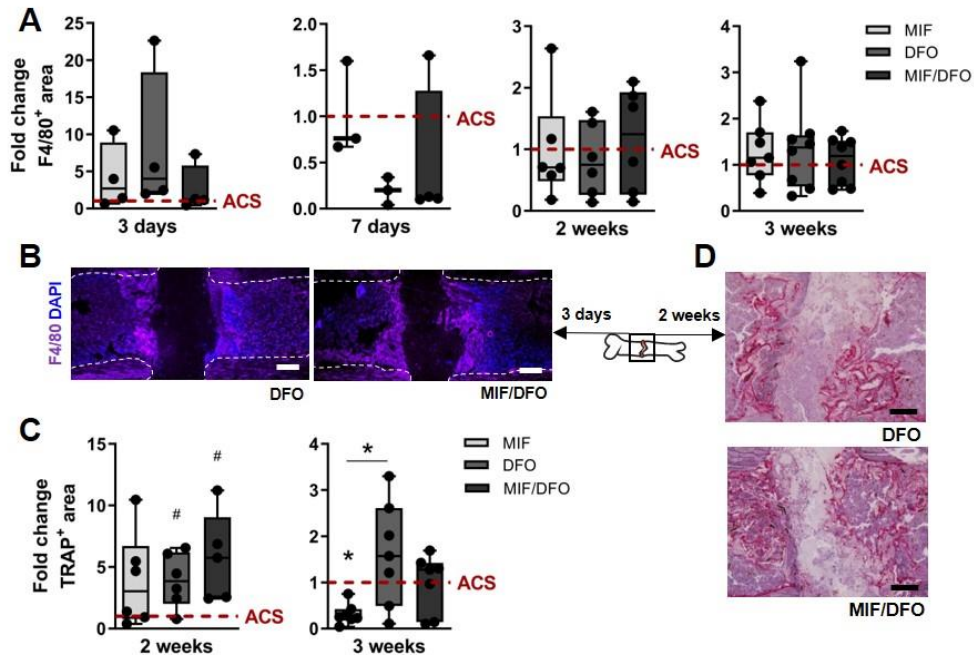

290

291 **Figure 4: Presence of F4/80<sup>+</sup> macrophages and TRAP<sup>+</sup> cells within the fracture gap.** (A) Quantified F4/80<sup>+</sup> area in  
292 the gap after 3, 7 days and 2, 3 weeks normalized to the median of the ACS group (indicated as dotted line = 1; day 3,  
293 7: N = 3-4; week 2, 3: N = 6-8). (B) Representative images for DFO and MIF/DFO at day 3. White dotted lines  
294 indicate cortices. Schematic bone indicates alignment of images. (C) Quantification of TRAP<sup>+</sup> area at week 2 and 3  
295 normalized to the median of the ACS group (indicated as dotted line = 1) and (D) representative images. Scale bars  
296 = 200 $\mu$ m. Data are shown as box plots with the median as horizontal line, interquartile range as boxes,  
297 minimum/maximum as whiskers and individual data points. Wilcoxon signed rank test was applied to determine  
298 difference against the ACS control group (hypothetical value = 1) and Kruskal Wallis test with Dunn's multiple  
299 comparison test was used to compare groups. #P < 0.07; \*P < 0.05.

### 300 **Polyglycerol sulfate-based hydrogels as a potential releasing system for DFO**

301 Our results provide evidence for a beneficial effect of DFO in fracture healing and in combination  
302 with MIF. In order to delineate a therapeutic option for fracture healing disorders based on HIF-stabilization  
303 for e.g. patients with a delayed healing potential due to immunological and/or angiogenic constraints (31,  
304 59), we evaluated the potential of an appropriate delivery/release system. Based on the observation that the  
305 fracture hematoma obtained from immune-suppressed patients revealed an upregulated inflammatory  
306 profile during the initial phase of fracture healing, we tested dendritic polyglycerol sulfate (dPGS)-based  
307 polyethylene glycol-dicyclooctyne (PEG-DIC) hydrogels, which have been developed to act anti-  
308 inflammatory (31, 32, 60-62). In addition, we used non-sulfated dendritic polyglycerol (dPG)-based PEG-  
309 DIC hydrogels as control and potential alternative. Release of DFO from dPG-based hydrogels was slower

310 compared to dPGS-based hydrogels over an observation span of 9 days (**Fig. 5A**). Supernatants from the  
311 release assay were transferred to HEK 293 cells, and protein was collected after 24h. Western blot analysis  
312 still indicated the functionality of the released DFO to stabilize HIF-1 $\alpha$  (**Fig. 5B**). hMSCs were co-cultivated  
313 for 2 weeks with the DFO-loaded hydrogels and calcification was analyzed by Alizarin red staining (**Fig.**  
314 **5C, D**). Unexpectedly, dPGS-based hydrogels seemed to have an inhibitory effect on *in vitro* hMSC  
315 calcification independent of DFO loading. Thus, we concluded that the combination of DFO with dPG-  
316 based hydrogels could be a beneficial approach regarding fracture healing. Moreover, a single dose  
317 application/injection proved to be a promising alternative.

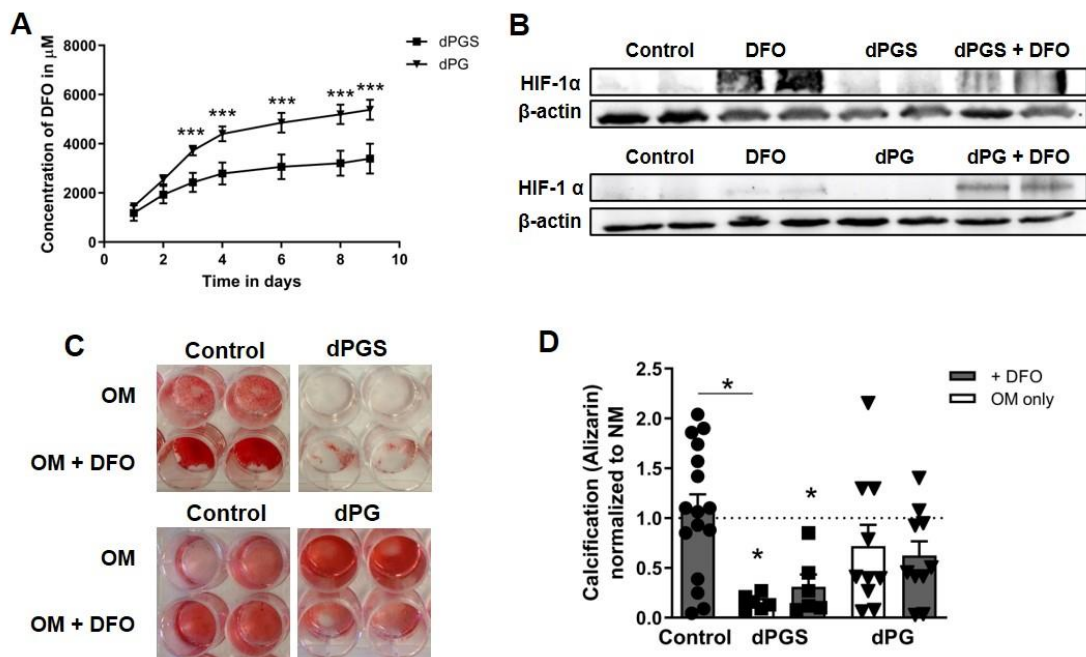

318  
319 **Figure 5: Release studies of DFO from a polyglycerol sulfate-based hydrogel (dPGS) and a polyglycerol-based**  
320 **hydrogel (dPG).** (A) DFO release studies from the hydrogels measured over 9 days. Data is shown as mean  $\pm$  SD ( $N$   
321 = 6). Two-way ANOVA with Bonferroni posttest was performed to determine significant differences. \*\*\* $P < 0.001$ .  
322 (B) Western blot for HIF-1 $\alpha$  and  $\beta$ -actin from HEK 293 cells treated with supernatants from the release experiments.  
323 (C, D) Alizarin staining was performed to determine the effect of the hydrogels and the released DFO on hMSC  
324 calcification at 2 weeks. ( $N = 6-11$ ). OM = osteogenic medium/control. Exemplary images of Alizarin red staining in  
325 24 well are displayed. Data are shown as box plots with the mean  $\pm$  SEM and individual data points. Wilcoxon signed  
326 rank test was applied to determine difference against the OM control group (hypothetical value = 1) and Kruskal  
327 Wallis test with Dunn's multiple comparison test was used to compare groups. \* $P < 0.05$ .

328



## 329 **Discussion**

---

330 Patients with fracture healing disorders often require further surgeries, experience substantial pain  
331 and suffer from prolonged functional impairments. While fracture healing is usually completed within 3 to  
332 4 months, non-unions are identified if healing does not succeed after 9 months (no radiological bridging of  
333 fragments is visible; (1, 2). Current treatment modalities of non-union include surgical revision, autologous  
334 bone grafting or local stimulation of healing by e.g. rhBMP-2 for local delivery into the fracture gap.  
335 However, several adverse effects have been reported with BMP-2 and thus clinical usage is strongly  
336 restricted (63). Preventive measures for patients potentially at risk do not yet exist. Therefore, strategies that  
337 would allow to treat patients with a probable lack in their healing capability early on would be highly  
338 desirable. Our single-center retrospective study identified specifically patients with dysregulation of the  
339 immune system (e.g. RA) or disturbed capacities in angiogenesis (e.g. smoking) as being at high risk to  
340 experience a non-union (**Table 1**), which is in agreement with other reports (6, 64). Induction of regenerative  
341 processes within the initial phase of fracture healing depends on an adequate cellular adaptation to the  
342 hypoxic microenvironment of the fracture gap (31). Therefore, we hypothesized that stabilization of HIF-  
343 1 $\alpha$  could be an effective approach for the prevention of fracture healing disorders. Based on a systematic  
344 literature review, we identified DFO as stimulatory factor in bone regeneration for both a variety of clinical  
345 bone healing settings (including mandibular defects and critical size defects) and across various species and  
346 models (mouse, rat, rabbit) (**Table 2**). *In vitro*, we could demonstrate the effect of a single-dose application  
347 of DFO alone and DFO in synergy with MIF to counteract a GC-induced inhibition of calcification during  
348 osteogenic differentiation of hMSCs. Finally, we could demonstrate in an *in vivo* proof-of-concept  
349 experiment that DFO alone or in synergy with MIF can prevent delayed bone healing in a locally impaired  
350 healing model that uses a bovine Col I scaffold in a mouse-osteotomy.

351 Since GCs negatively affect bone metabolism, it is not surprising that GCs have also been reported  
352 to negatively affect bone healing (65). Although GCs are essential for osteogenic differentiation at low  
353 concentrations, high GC concentrations inhibit osteogenic differentiation and proliferation while favoring  
354 adipogenesis (66-71). Therefore, we selected the potent GC dexamethasone to effectively inhibit *in vitro*

355 calcification of hMSCs as an *in vitro* model for disturbed bone synthesis to test the ability of HIF-stabilizers  
356 to re-establish osteogenic differentiation within the present study (Fig. 1). Of note, beside its stabilizing  
357 effect on HIF-1 $\alpha$ , DFO directly influences hMSC differentiation via beta-catenin signaling cascades (72).  
358 Interestingly, Cobalt(II) chloride, another HIF-stabilizer also increased osteogenic differentiation as  
359 recently reported (73). Nevertheless, the counteracting potential of DFO for GC-induced inhibition of  
360 osteogenic differentiation as shown in the present study, has not been reported, yet.

361 However, the ability of MIF, the natural counter-regulator of GC action, to support hypoxia-mediated  
362 HIF-1 $\alpha$  stabilization has been shown independently by two groups (33, 74). The *in vitro* findings presented  
363 here demonstrate that the impact of MIF alone is not sufficient to overcome the high-dose GC-mediated  
364 suppression of osteogenic differentiation. However, MIF – in combination with DFO – synergistically  
365 enhanced the counteracting potential of DFO on hMSC calcification (**Fig. 1**). Taken together, DFO and its  
366 combination with MIF re-established osteogenic-induced hMSC calcification in a high-dose GC *in vitro*  
367 model for disturbed bone synthesis.

368 When analyzing HIF stabilizers/enhancers in an *in vivo* model of delayed healing using a mouse-  
369 osteotomy-model, we clearly demonstrated that application of DFO alone or in combination with MIF  
370 enhanced mineralized callus formation after 14 and 21 days (**Fig. 2**). This is in line with several previous  
371 reports on DFO administered in rat- or mouse-osteotomy-models of *Ossa irregularia* (mandibula or  
372 zygomatic arch) and long bones (femur or tibia) (35-48, 50, 53, 54, 56, 75, 76). All studies showed a strong  
373 positive effect of DFO on bone and vessel formation although the application routes and concentrations  
374 differed. Most comparable to our present work are the studies of Wan *et al.* and Yao *et al.* using the mouse-  
375 osteotomy-model with medullary pin fixation, but with day-wise repeated local injections of 200  $\mu$ M DFO  
376 (35, 77). In the study presented here, our hypothesis was that a single dose of DFO alone or in combination  
377 with MIF is sufficient to accelerate bone formation. Indeed, we could verify our hypothesis by providing  
378 evidence for the enhanced mineralized bone formation at later time points (14 and 21 days; **Fig. 2**). Although  
379 the combination with MIF was supposed to further enhance the DFO-mediated enhancement of callus  
380 mineralization and bone formation, we assume that the DFO effect alone is strong enough and, therefore,

381 masks the potential additional effect of MIF. However, comparing the histomorphometric results on  
382 mineralized bone formation endosteal or intracortical, MIF alone and in combination with DFO showed  
383 significantly more mineralized bone in the endosteal compartment after 14 days (Fig. 2) indicating a pivotal  
384 role for MIF alone during fracture healing. Ondara *et al.* described higher expression levels of MIF during  
385 the fracture healing process, which has been also described in other regenerative processes such as wound  
386 healing (78, 79). MIF deficient mice showed impaired fracture healing caused by a reduced number of  
387 osteoclasts and increased osteoid production (80). In our hands, MIF, DFO and MIF/DFO strongly enhanced  
388 revascularization much faster than in the control group as shown by the ingrowth of CD31<sup>hi</sup> Emcn<sup>hi</sup> ECs into  
389 the osteotomy gap (week 2 vs. 3; **Fig. 3**). Kusumbe *et al.* described these cells to be part of a bone tissue  
390 specific vessel subtype linking angiogenesis and bone formation via Notch and HIF-1  $\alpha$  signaling and  
391 located the CD31<sup>hi</sup> Emcn<sup>hi</sup> ECs to the bone surfaces and into the growth plate (81, 82). Moreover, stabilizing  
392 HIF by hypoxia or DFO leads to an induction of *VEGF* expression in different cell types being the major  
393 driver of vascularization also during fracture healing (37, 52, 76).

394 In addition, we observed an accelerated recruitment of macrophages and osteoclast activity based on  
395 TRAP activity in the DFO and MIF/DFO group (**Fig. 4**). DFO strongly supported resorption of biomaterial  
396 by enhancing osteoclast activity (75), while MIF is well-known to promote osteoclastogenesis by interacting  
397 with the RANKL pathway (80, 83-85). Furthermore, macrophages play a pivotal role during the whole  
398 fracture healing process. Most importantly they promote vascularization and angiogenesis by degrading  
399 ECM, which supports the release of angiogenic factors (86, 87). Very recently, we have demonstrated the  
400 close interconnection between macrophages and vessel formation during fracture healing (57).

401 Finally, we propose dPG as a release system to apply DFO, which may not interfere with the healing  
402 process. The advantage of synthetic, biodegradable hydrogels such as dPG is the possibility to adjust the  
403 properties of the hydrogel to the specific requirements of the fracture gap. We found that the combination  
404 of DFO with dPG could be a promising approach (Fig. 5). However, further studies are needed to optimize  
405 the delivery system by further modifications (88). Until today, no appropriate delivery system has been  
406 approved clinically.

407 In summary, our data provides convincing evidence on the potential of DFO to accelerate bone  
408 healing by enhancing mineralization and vessel formation. In addition, MIF alone used at a concentration  
409 of 100 ng/ml rather showed inhibitory properties in the regeneration process. The additional effect of MIF  
410 on top of the DFO effect was only seen for a few outcomes – e.g. vessel formation. Therefore, it can be  
411 supposed that MIF acts concentration-dependent, and further studies on the dosage finding are needed. Here,  
412 we showed that the combination of HIF-stabilizers can counteract delayed fracture healing. DFO is  
413 approved by the FDA, commercially available (e.g. Desferal® by Novartis AG) and listed on World Health  
414 Organization's List of Essential Medicines. We consider DFO as suitable for rapid clinical translation to  
415 improve fracture healing and to be used as preventive strategy to avoid bone healing disorders in patients at  
416 high risk (e.g. RA and smoking). Therefore, we are currently striving to start a multi-centric confirmatory  
417 study with the long-term goal of clinical translation.

#### 418 ***Limitations***

419 In the present study, hMSCs were isolated via migration from the bone marrow although normal  
420 protocols recommend density gradient centrifugation. We see increased cell numbers that can be an  
421 indication for higher heterogeneity in the following cell culture, which can influence the experimental  
422 outcomes. Density gradient centrifugation also has disadvantages such as the loss of smaller cell populations  
423 including high proliferative hMSCs. Moreover, there are varying protocols for density gradient  
424 centrifugation provided in the literature which does not guarantee reproducibility (89). Furthermore, there  
425 is strong evidence in the literature that freshly isolated hMSCs differ from isolated and cultivated hMSCs  
426 in their transcriptome and secretome indicating that conclusion from *in vitro* studies should be translated  
427 carefully towards *in vivo* assumptions (90). In the present study, the *in vitro* studies were rather used as a  
428 tool to get insights for further *in vivo* studies than investigating specific pathways.

429 For the *in vitro* studies on DFO/MIF in our GC-induced delayed calcification assay, all hMSCs were  
430 expanded and cultivated in monolayer under normoxic condition which does not parallel the normal bone  
431 marrow niche, particularly 3D and hypoxia (91, 92). Moreover, a heterogenic population of hMSCs was  
432 used for the assays while distinct subpopulations can be influenced differently by the treatments (93). In

433 addition, high dexamethasone concentrations were required to mimic significant inhibitory effects of GCs  
434 *in vitro*. Those concentrations do not resemble clinically used dosages.

435         Additionally, it should be taken into account that the present study was conducted in mice, and the  
436 interpolation to the human is limited. In general, in orthopedic research rodents as well as large animal  
437 models are most commonly used. Mice are favored for basic research questions due to the possibility of  
438 genetical modifications. In contrast, sheep or pigs are preferred for translational approaches, and rats are  
439 more often used for pharmacological interventions and toxicological studies. Most animal species show  
440 slight analogies to the human bone macro- and microstructure. Main differences between mice and humans  
441 comprise permanent opening of the growth plate in the epiphyses of long bones leading to a lifelong skeletal  
442 modeling, the lack of a Haversian system and low cancellous bone content at the epiphyses of long bones  
443 (94, 95). Here, a mouse-osteotomy-model was used which does not completely heal within a time period of  
444 21 days (osteotomy gap 0.7 mm) in the control group. Thus, an improvement in the healing process can be  
445 seen in treated groups. This model only works in female mice since the bone healing process is slower in  
446 females than in males (96). However, it is not always possible to determine the exact time frames for every  
447 phase during the fracture healing process which makes the interpretation much more complex and might  
448 impact especially small differences. This might be a reason why the proposed beneficial effect of MIF is  
449 not visible indicating a more technical and methodical challenge rather than a biological non-function.

450

## 451 **Materials and Methods**

---

### 452 *Single-center retrospective study*

453 In cooperation with the Center for Musculoskeletal Surgery, Charité-Universitätsmedizin Berlin,  
454 patient files from patients who were once stationary treated in the hospital during 2012 were screened for  
455 ICD-10 classifications M 84.0 (malunion of fracture), M 84.1 (nonunion of fracture) or M 84.2 (delayed  
456 union of fracture). Impairment was confirmed by x-rays and patient information as well as patient's history.  
457 Ethical approval for the search algorithm and evaluation sheet was provided by the local ethics committee  
458 (EA1/349/13). Due to the retrospective character and anonymization, no consent by the included patients  
459 was needed. The selected patient files were additionally reviewed by orthopedic experts before inclusion in  
460 the study. Therefore, x-rays and patient information as well as history were re-analyzed in detail. Exclusion  
461 criteria were age < 18 years, open fractures and metastases close to the fracture location. Collected data  
462 included age, sex, birthday, body height and weight, and fracture related patient's history including cause,  
463 treatment location and complications. In addition, information on lifestyle (e.g. alcoholism, smoking),  
464 comorbidities and medications were gathered. The BMI was calculated based on body height and weight.  
465 For statistical analysis, the modelling was performed based on univariable and multivariable logistic  
466 regression using SPSS V. 22. The first model was built to determine the potential influence of each variable  
467 on the fracture healing outcome. The second model served to identify potential confounding factors and  
468 verify the independent contribution of variables to the fracture healing outcome.

### 469 *Systematic literature review*

470 For the systematic literature review the following search terms were used for a Pubmed based search:  
471 (“deferroxamine”[Tiab] OR “DFO”[Tiab] OR “DFX” [Tiab] OR “PHD inhibitor”[Tiab]) AND  
472 (“fracture”[Tiab] OR “fracture healing”[Tiab] OR “bone healing”[Tiab] OR “bone regeneration”[Tiab] OR  
473 “bone formation”[Tiab] OR “osteotomy”[Tiab]) - Filters activated: Publication date to 2019/02/28. Google  
474 scholar was searched in addition with the terms: deferroxamine, bone healing, fracture. The detailed search  
475 strategy is comprehensively explained in **figure S2** following the PRISMA guidelines and recommendations  
476 from Syrf and Syrcle.

477 ***Study design – In vitro and in vivo studies***

478 The overall hypothesis of the study was that the local application of MIF/DFO in long bone fractures  
479 enhances new bone formation (osteinduction) and can be used to accelerate fracture healing for the  
480 treatment and prevention of fracture healing disorders. For the *in vitro* studies, the endpoints were previously  
481 defined by hMSC calcification (Alizarin red staining). For the *in vivo* study the primary endpoint was the  
482 bone formation rate (bone volume/total volume) as measured via *ex vivo*  $\mu$ CT after 2 weeks. Additional  
483 endpoints were defined by histomorphometry. Four time points were determined for additional endpoint  
484 measurements. The healing outcome was investigated via *ex vivo*  $\mu$ CT and histology at day 14 and 21. Two  
485 operated animals were excluded due to infection in the osteotomy gap and one animal was partially excluded  
486 (only included for *ex vivo*  $\mu$ CT) due to an oblique fixation.

487 *In vitro* studies using hMSCs were performed as proof of concept and possibility to determine an  
488 adequate concentration of DFO/MIF to be used *in vivo*. hMSCs were used from 4 to 6 different donors  
489 (biological replicates) in at least triplicates per experiment and condition (technical replicates). Data was  
490 only excluded if donors failed to differentiate as indicated by a positive control that was carried out on every  
491 plate. Only hMSCs that passed characterization were used. Calcification was measured via Alizarin red  
492 staining as selected prospectively.

493 For the *in vivo* study, power analysis was performed prior to animal tests (nQuery) to determine the  
494 animal number with the results to use a minimum of 6 animals to attain worthwhile results and was provided  
495 in detail with the animal experiment application. All analyses were performed blinded for the experimenter  
496 by randomly numbering the animals. Animals were randomized for pairs and treatment groups, although  
497 animals in one cage were treated with the same substances.

498 ***hMSC cultivation and calcification assay***

499 Bone marrow was collected from patients undergoing total hip replacement at the Center for  
500 Musculoskeletal Surgery, Charité-Universitätsmedizin Berlin. Samples were registered and distributed by  
501 the “Tissue Harvesting” Core Facility of the Berlin Institute of Health Center for Regenerative Therapies  
502 (BCRT) (table S3). Written consents were gathered from all patients. All protocols were approved by the

503 local ethics committee (EA1/012/13) and performed according to the Helsinki Declaration. hMSC isolation,  
504 expansion and full characterization (FACS, differentiation) was performed as described previously (56, 97).  
505 Expansion was done with DMEM plus GlutaMAX (Thermo Fischer Scientific), 10% FCS (PAA  
506 Laboratories), 1% Penicillin-Streptomycin (Thermo Fischer Scientific) at 37°C in 5% CO<sub>2</sub> atmosphere (app.  
507 18% O<sub>2</sub>). Cells were used within passage 4-7. For the calcification assay, hMSCs were transferred to a 96-  
508 well plate with a density of 1x10<sup>4</sup> cells/well, cultivated for 24 h and treated with osteogenic medium (OM)  
509 consisting of DMEM, 10% FCS, 1% Penicillin-Streptomycin, 10 mM β-glycerophosphate, 10<sup>-8</sup> M  
510 dexamethasone water-soluble and 0.1 mM L-ascorbic acid-2-phosphate (Sigma Aldrich). Dexamethasone,  
511 Deferoxamine mesylate salt (DFO; Sigma Aldrich) and MIF (lab own production) were supplemented in  
512 different concentrations to the medium. Medium was changed weekly. For the release studies OsteoDiff  
513 (Miltenyi Biotech) was used supplemented with 1% Penicillin-Streptomycin. For Alizarin red staining cells  
514 were fixed with 4% formaldehyde (15 min RT; Carl Roth), washed twice with PBS and stained with 0.5 %  
515 Alizarin Red (Sigma Aldrich) in H<sub>2</sub>O<sub>dest</sub> (pH 4) for 10 min at RT followed by 4 washing steps with H<sub>2</sub>O<sub>dest</sub>  
516 and application of 10% cetylpyridinium chloride solution (AppliChem) for 30 min at RT. Supernatants were  
517 transferred to a new 96 well plate and measured with a Synergy HT plate reader (BioTek Instruments) at a  
518 wavelength of 562 nm (reference wavelength 630 nm) for quantification.

### 519 ***Animals, housing and osteotomy***

520 Female C57BL/6N mice (12 weeks; body weight 20 – 25 g; Charles River Laboratories) were housed  
521 in the Charité animal facility (FEM; semi-sterile - outside the SPF barrier) in pairs in Euro standard Type II  
522 clear-transparent plastic cages and kept under obligatory hygiene standards monitored according to the  
523 FELASA standards. Nesting material was provided in sufficient amount while pipes and houses were  
524 withdrawn after osteotomy to avoid possible entanglement with the used external fixator. Food and water  
525 were available ad libitum and the temperature was (20 ± 2 °C) controlled with a 12 h light/dark period and  
526 a humidity of 45-50%.



527 All experiments were carried out with ethical permission according to the policies and principles  
528 established by the Animal Welfare Act, the National Institutes of Health Guide for Care and Use of  
529 Laboratory Animals, and the National Animal Welfare Guidelines, the ARRIVE guidelines and were  
530 approved by the local legal representative animal rights protection authorities (Landesamt für Gesundheit  
531 und Soziales Berlin: G 0111/13, 0039/16). Pain management and osteotomy were performed as described  
532 in detail previously (56, 57, 98, 99). In short, for analgesia a buprenorphine injection (0.1 mg/kg; Temgesic,  
533 RB Pharmaceuticals Limited) *s.c.* was given prior to the surgery and Tramadol (0.1 mg/ml; Drops,  
534 Grünenthal GmbH) was applied with the drinking water for the first 3 post-operative days. Anesthesia was  
535 conducted with isoflurane and O<sub>2</sub> supplementation and mice were prepared with eye ointment (Bayer  
536 Pharma AG) and clindamycin *s.c.* (0.02 ml; Ratiopharm GmbH). Osteotomy with an external fixator  
537 (MouseExFix, RISystem) was performed at the left femur creating a 0.70 mm osteotomy gap with a Gigli  
538 wire saw. The osteotomy gap was filled with PBS-soaked ACS (control; Lyostypt, B. Braun) or MIF and/or  
539 DFO solved in PBS applied on the ACS (treatment groups; 100 ng/ml and/or 250 μM, respectively) (56,  
540 98). After skin closure, mice received warmed NaCl (0.2 ml) *s.c.* returned to their cages with a prepared nest  
541 and an infrared radiator. Animals were euthanized via cervical dislocation after 3, 7, 14 and 21 days in deep  
542 anesthesia (no deep pain perception) after intracardial blood collection. Osteotomized femora were collected  
543 and either fixed with 4% paraformaldehyde (PFA; Electron Microscopy Sciences) for 6-8 h at 4°C.

#### 544 ***Ex vivo micro computed tomography (μCT)***

545 PFA-fixed femora were treated with an ascending sucrose solution (10%, 20%, 30%) for 24 h,  
546 respectively at 4°C. Scanning of 191 slices was performed after removal of the pins and external fixator  
547 with an isotropic voxel size of 10.5 μm (70 KVp, 114 μA; SCANCO μCT Viva 40), aligned scan axis along  
548 the diaphyseal axis of the femora and 3D reconstruction and analyses were performed using the provided  
549 software package as described previously and applying a fixed global threshold of 240 mg HA/cm<sup>3</sup> for the  
550 automatic 3D callus tissue analysis (56, 98). Nomenclature and analysis were conducted in accordance with  
551 published recommendations (100).

## 552 ***Histology and immunofluorescence***

553           After  $\mu$ CT scanning, femora were cryo-embedded without decalcification according to the Kawamoto  
554 *et al.* method (101). For Movat's pentachrome staining slices (7  $\mu$ m) were air dried for 30 min, fixed with  
555 4 % PFA for 10 min and washed with H<sub>2</sub>O<sub>dest</sub> for 5 min. The staining procedure was conducted using a  
556 protocol already been published (56, 102). The staining results allowed to distinguish between different  
557 tissues: mineralized bone or mineralized cartilage appear yellow, hyaline cartilage green, cytoplasm reddish,  
558 cell nuclei blue-black and the surrounding muscles are colored in reddish. When combined with Von Kossa  
559 staining – the following staining steps were conducted before the Movat's pentachrome staining: 3% (w/v)  
560 silver nitrate solution (10 min), washing step with H<sub>2</sub>O<sub>dest</sub>, sodium carbonate formaldehyde solution (2 min),  
561 washing step with tap water, 5% (w/v) sodium thiosulphate solution (5 min), washing step with tap water  
562 and H<sub>2</sub>O<sub>dest</sub>. Images were taken with a light microscope (Leica) in a 2.5x magnification and the program  
563 Axiovision (Carl Zeiss Microscopy). The Acid Phosphatase, Leukocyte (TRAP) Kit (Sigma Aldrich) was  
564 used to stain for TRAP. Manufacturer's instructions were followed, and pictures were taken with a light  
565 microscope (Leica).

566           For immunofluorescence staining the following primary antibodies: CD31/PECAM-1 (goat  
567 polyclonal unconjugated, AF2628, R&D Systems, 1:100), Emcn (V.7C7 unconjugated, sc-65495, 1:100),  
568 F4/80 (Cl:A3-1 unconjugated, MCA497G, 1:400), Osx (rabbit polyclonal, sc-22536-R, 1:200) and  
569 secondary antibodies (all Thermo Fischer Scientific; 1:500): anti-rat conjugated AF594 (A21209), anti-  
570 rabbit conjugated AF488 (A21206), anti-rat conjugated AF647 (A21247), anti-goat conjugated AF647  
571 (A21447) or anti-goat A568 (A11057) were used. Staining procedure was performed in a wet section as  
572 published earlier (56, 57). Pictures were taken with a fluorescence microscope BZ 9000 (Keyence). Image  
573 analysis was performed with ImageJ (56, 57, 98).

## 574 ***DFO release assay***

575           In order to measure the DFO concentration in the supernatant we established the method described  
576 by Fielding and Brunström 1964 (103). The method is based on the ability of DFO to bind iron and therefore

577 reduces ferric chloride ( $\text{Fe}^{3+}$ ) to ferrioxamine (red-brown compound). Measurements were taken including  
578 all components (citric acid and  $\text{Na}_2\text{HPO}_4$ ) and a ferric chloride concentration of 1.5 mg/100 ml at a  
579 wavelength of 450 nm (Synergy HT plate reader, BioTek Instruments). Release kinetic experiments were  
580 performed in PBS. Hydrogel formation was performed as described in detail before (104). 100  $\mu\text{l}$  of 20%  
581 dPG or dPGS were mixed with 10.000  $\mu\text{M}$  DFO and polymerized for 1h at 37°C. For release kinetic and  
582 transfer assay 200  $\mu\text{l}$  PBS were added and supernatants were collected every 24h. For transfer assay to HEK  
583 293 cells supernatant was collected after 24h and mixed with normal expansion medium (1:10). HEK 293  
584 were treated for 24h before collecting protein and performing HIF-1 $\alpha$  western blot as described before (105).  
585 For co-cultivation with hMSCs, hydrogels were polymerized in 24-well transwell inserts (Sarstedt;  
586 polyethylene terephthalate membrane with 8  $\mu\text{m}$  pore size). After polymerization, hydrogels were treated  
587 for 12h with osteogenic medium at 37°C for equilibration and transferred to a 24-well plate seeded with  
588 hMSCs. Co-cultivation was performed for 14 days with supplementation of osteogenic medium. Alizarin  
589 red staining was used to visualize calcification of hMSCs.

### 590 ***Statistical analysis***

591 Statistical analysis was carried out with GraphPad Prism V.8 software. All values from *in vitro* assays  
592 were expressed as the mean  $\pm$  SD or SEM when measured in > duplicates and all values from animal  
593 experiments are depicted as median  $\pm$  ranges (box and whiskers plot with individual data points). Kruskal  
594 Wallis test with Dunn's multiple comparison test and Wilcoxon-signed rank test were applied in case of  
595 lack of Gaussian distribution that was tested before via Kolmogorov-Smirnov test. A *p-value* <0.05 was  
596 considered as statistically significant. In some cases, statistical trends are indicated with a hashtag (#) when  
597 biologically relevant.

598

## 599 References

- 600 1. D. J. Hak, D. Fitzpatrick, J. A. Bishop, J. L. Marsh, S. Tilp, R. Schnettler, H. Simpson, V. Alt,  
601 Delayed union and nonunions: epidemiology, clinical issues, and financial aspects. *Injury* **45 Suppl**  
602 **2**, S3-7 (2014).
- 603 2. K. D. Hankenson, G. Zimmerman, R. Marcucio, Biological Perspectives of Delayed Fracture  
604 Healing. *Injury* **45**, S8-S15 (2014).
- 605 3. R. Zura, Z. Xiong, T. Einhorn, J. T. Watson, R. F. Ostrum, M. J. Prayson, G. J. Della Rocca, S.  
606 Mehta, T. McKinley, Z. Wang, R. G. Steen, Epidemiology of Fracture Nonunion in 18 Human  
607 Bones. *JAMA Surg* **151**, e162775 (2016).
- 608 4. A. H. Karladani, H. Granhed, J. Karrholm, J. Styf, The influence of fracture etiology and type on  
609 fracture healing: a review of 104 consecutive tibial shaft fractures. *Arch Orthop Trauma Surg* **121**,  
610 325-328 (2001).
- 611 5. J. A. Sclaro, M. L. Schenker, S. Yannascoli, K. Baldwin, S. Mehta, J. Ahn, Cigarette smoking  
612 increases complications following fracture: a systematic review. *J Bone Joint Surg Am* **96**, 674-681  
613 (2014).
- 614 6. L. Claes, S. Recknagel, A. Ignatius, Fracture healing under healthy and inflammatory conditions.  
615 *Nat Rev Rheumatol* **8**, 133-143 (2012).
- 616 7. B. Dominiak, W. Oxberry, P. Chen, Study on a nonhealing fracture from a patient with systemic  
617 lupus erythematosus and its pathogenetic mechanisms. *Ultrastruct Pathol* **29**, 107-120 (2005).
- 618 8. B. Stromqvist, Hip fracture in rheumatoid arthritis. *Acta Orthop Scand* **55**, 624-628 (1984).
- 619 9. I. Domic-Cule, M. Peric, L. Kucko, L. Grgurevic, M. Pecina, S. Vukicevic, Bone morphogenetic  
620 proteins in fracture repair. *International Orthopaedics* **42**, 2619-2626 (2018).
- 621 10. G. S. Krishnakumar, A. Roffi, D. Reale, E. Kon, G. Filardo, Clinical application of bone  
622 morphogenetic proteins for bone healing: a systematic review. *Int Orthop*, (2017).
- 623 11. M. C. Simmonds, J. V. Brown, M. K. Heirs, J. P. Higgins, R. J. Mannion, M. A. Rodgers, L. A.  
624 Stewart, Safety and effectiveness of recombinant human bone morphogenetic protein-2 for spinal  
625 fusion: a meta-analysis of individual-participant data. *Ann Intern Med* **158**, 877-889 (2013).
- 626 12. T. A. Einhorn, L. C. Gerstenfeld, Fracture healing: mechanisms and interventions. *Nat Rev*  
627 *Rheumatol* **11**, 45-54 (2015).
- 628 13. P. Kolar, K. Schmidt-Bleek, H. Schell, T. Gaber, D. Toben, G. Schmidmaier, C. Perka, F. Buttgerit,  
629 G. N. Duda, The early fracture hematoma and its potential role in fracture healing. *Tissue Eng Part*  
630 *B Rev* **16**, 427-434 (2010).
- 631 14. C. J. Kowalczewski, S. Tombyln, D. C. Wasnick, M. R. Hughes, M. D. Ellenburg, M. F. Callahan,  
632 T. L. Smith, M. E. Van Dyke, L. R. Burnett, J. M. Saul, Reduction of ectopic bone growth in  
633 critically-sized rat mandible defects by delivery of rhBMP-2 from keratine biomaterials.  
634 *Biomaterials* **35**, 3220-3228 (2014).
- 635 15. K. Schmidt-Bleek, A. Petersen, A. Dienelt, C. Schwarz, G. N. Duda, Initiation and early control of  
636 tissue regeneration - bone healing as a model system for tissue regeneration. *Expert opinion on*  
637 *biological therapy* **14**, 247-259 (2014).
- 638 16. K. Schmidt-Bleek, H. Schell, J. Lienau, N. Schulz, P. Hoff, M. Pfaff, G. Schmidt, C. Martin, C.  
639 Perka, F. Buttgerit, H. D. Volk, G. Duda, Initial immune reaction and angiogenesis in bone healing.  
640 *J Tissue Eng Regen Med* **8**, 120-130 (2014).
- 641 17. J. Lienau, K. Schmidt-Bleek, A. Peters, F. Haschke, G. N. Duda, C. Perka, H. J. Bail, N. Schutze,  
642 F. Jakob, H. Schell, Differential regulation of blood vessel formation between standard and delayed  
643 bone healing. *J Orthop Res* **27**, 1133-1140 (2009).
- 644 18. D. R. Epari, J. P. Kassi, H. Schell, G. N. Duda, Timely fracture-healing requires optimization of  
645 axial fixation stability. *J Bone Joint Surg Am* **89**, 1575-1585 (2007).
- 646 19. D. R. Epari, H. Schell, H. J. Bail, G. N. Duda, Instability prolongs the chondral phase during bone  
647 healing in sheep. *Bone* **38**, 864-870 (2006).
- 648 20. J. Lienau, H. Schell, G. N. Duda, P. Seebeck, S. Muchow, H. J. Bail, Initial vascularization and  
649 tissue differentiation are influenced by fixation stability. *J Orthop Res* **23**, 639-645 (2005).

- 650 21. P. Strube, U. Sentuerk, T. Riha, K. Kaspar, M. Mueller, G. Kasper, G. Matziolis, G. N. Duda, C.  
651 Perka, Influence of age and mechanical stability on bone defect healing: age reverses mechanical  
652 effects. *Bone* **42**, 758-764 (2008).
- 653 22. H. Aro, E. Eerola, A. J. Aho, J. Niinikoski, Tissue oxygen tension in externally stabilized tibial  
654 fractures in rabbits during normal healing and infection. *J Surg Res* **37**, 202-207 (1984).
- 655 23. D. R. Epari, J. Lienau, H. Schell, F. Witt, G. N. Duda, Pressure, oxygen tension and temperature in  
656 the periosteal callus during bone healing--an in vivo study in sheep. *Bone* **43**, 734-739 (2008).
- 657 24. B. Chen, Y. L. Yan, C. Liu, L. Bo, G. F. Li, H. Wang, Y. J. Xu, Therapeutic effect of deferoxamine  
658 on iron overload-induced inhibition of osteogenesis in a zebrafish model. *Calcif Tissue Int* **94**, 353-  
659 360 (2014).
- 660 25. C. Lu, M. Rollins, H. Hou, H. M. Swartz, H. Hopf, T. Miclau, R. S. Marcucio, Tibial fracture  
661 decreases oxygen levels at the site of injury. *Iowa Orthop J* **28**, 14-21 (2008).
- 662 26. C. Lu, N. Saless, D. Hu, X. Wang, Z. Xing, H. Hou, B. Williams, H. M. Swartz, C. Colnot, T.  
663 Miclau, R. S. Marcucio, Mechanical stability affects angiogenesis during early fracture healing. *J*  
664 *Orthop Trauma* **25**, 494-499 (2011).
- 665 27. E. Tøndevold, J. Eriksen, E. Jansen, Observations on long bone medullary pressures in relation to  
666 arterial PO<sub>2</sub>, PCO<sub>2</sub> and pH in the anaesthetized dog. *Acta Orthop Scand* **50**, 645-651 (1979).
- 667 28. T. Gaber, R. Dziurla, R. Tripmacher, G. R. Burmester, F. Buttgerit, Hypoxia inducible factor (HIF)  
668 in rheumatology: low O<sub>2</sub>! See what HIF can do! *Annals of the rheumatic diseases* **64**, 971-980  
669 (2005).
- 670 29. C. Maes, G. Carmeliet, E. Schipani, Hypoxia-driven pathways in bone development, regeneration  
671 and disease. *Nature Reviews Rheumatology* **8**, 358 (2012).
- 672 30. D. E. Komatsu, M. Hadjiargyrou, Activation of the transcription factor HIF-1 and its target genes,  
673 VEGF, HO-1, iNOS, during fracture repair. *Bone* **34**, 680-688 (2004).
- 674 31. P. Hoff, T. Gaber, K. Schmidt-Bleek, U. Senturk, C. L. Tran, K. Blankenstein, S. Lutkecosmann, J.  
675 Bredahl, H. J. Schuler, P. Simon, G. Wassilew, F. Unterhauser, G. R. Burmester, G. Schmidmaier,  
676 C. Perka, G. N. Duda, F. Buttgerit, Immunologically restricted patients exhibit a pronounced  
677 inflammation and inadequate response to hypoxia in fracture hematomas. *Immunol Res* **51**, 116-122  
678 (2011).
- 679 32. P. Hoff, T. Gaber, C. Strehl, M. Jakstadt, H. Hoff, K. Schmidt-Bleek, A. Lang, E. Rohner, D.  
680 Huscher, G. Matziolis, G. R. Burmester, G. Schmidmaier, C. Perka, G. N. Duda, F. Buttgerit, A  
681 Pronounced Inflammatory Activity Characterizes the Early Fracture Healing Phase in  
682 Immunologically Restricted Patients. *Int J Mol Sci* **18**, DOI: 10.3390/ijms18030583 (2017).
- 683 33. T. Gaber, S. Schellmann, K. B. Erekul, M. Fangradt, K. Tykwinska, M. Hahne, P. Maschmeyer, M.  
684 Wagegg, C. Stahn, P. Kolar, R. Dziurla, M. Lohning, G. R. Burmester, F. Buttgerit, Macrophage  
685 migration inhibitory factor counterregulates dexamethasone-mediated suppression of hypoxia-  
686 inducible factor-1 alpha function and differentially influences human CD4<sup>+</sup> T cell proliferation  
687 under hypoxia. *J Immunol* **186**, 764-774 (2011).
- 688 34. Y. Wang, C. Wan, L. Deng, X. Liu, X. Cao, S. R. Gilbert, M. L. Bouxsein, M. C. Faugere, R. E.  
689 Guldberg, L. C. Gerstenfeld, V. H. Haase, R. S. Johnson, E. Schipani, T. L. Clemens, The hypoxia-  
690 inducible factor alpha pathway couples angiogenesis to osteogenesis during skeletal development.  
691 *The Journal of clinical investigation* **117**, 1616-1626 (2007).
- 692 35. C. Wan, S. R. Gilbert, Y. Wang, X. Cao, X. Shen, G. Ramaswamy, K. A. Jacobsen, Z. S. Alaql, A.  
693 W. Eberhardt, L. C. Gerstenfeld, T. A. Einhorn, L. Deng, T. L. Clemens, Activation of the hypoxia-  
694 inducible factor-1alpha pathway accelerates bone regeneration. *Proc Natl Acad Sci U S A* **105**, 686-  
695 691 (2008).
- 696 36. Y. Yan, H. Chen, H. Zhang, C. Guo, K. Yang, K. Chen, R. Cheng, N. Qian, N. Sandler, Y. S. Zhang,  
697 H. Shen, J. Qi, W. Cui, L. Deng, Vascularized 3D printed scaffolds for promoting bone  
698 regeneration. *Biomaterials* **190-191**, 97-110 (2019).



- 699 37. A. Donneys, A. S. Farberg, C. N. Tchanque-Fossuo, S. S. Deshpande, S. R. Buchman,  
700 Deferoxamine enhances the vascular response of bone regeneration in mandibular distraction  
701 osteogenesis. *Plast Reconstr Surg* **129**, 850-856 (2012).
- 702 38. A. Donneys, D. M. Weiss, S. S. Deshpande, S. Ahsan, C. N. Tchanque-Fossuo, D. Sarhaddi, B.  
703 Levi, S. A. Goldstein, S. R. Buchman, Localized deferoxamine injection augments vascularity and  
704 improves bony union in pathologic fracture healing after radiotherapy. *Bone* **52**, 318-325 (2013).
- 705 39. A. S. Farberg, D. Sarhaddi, A. Donneys, S. S. Deshpande, S. R. Buchman, Deferoxamine enhances  
706 bone regeneration in mandibular distraction osteogenesis. *Plast Reconstr Surg* **133**, 666-671 (2014).
- 707 40. A. Donneys, S. Ahsan, J. E. Perosky, S. S. Deshpande, C. N. Tchanque-Fossuo, B. Levi, K. M.  
708 Kozloff, S. R. Buchman, Deferoxamine restores callus size, mineralization, and mechanical strength  
709 in fracture healing after radiotherapy. *Plast Reconstr Surg* **131**, 711e-719e (2013).
- 710 41. A. Donneys, S. S. Deshpande, C. N. Tchanque-Fossuo, K. L. Johnson, J. T. Blough, J. E. Perosky,  
711 K. M. Kozloff, P. A. Felice, N. S. Nelson, A. S. Farberg, B. Levi, S. R. Buchman, Deferoxamine  
712 expedites consolidation during mandibular distraction osteogenesis. *Bone* **55**, 384-390 (2013).
- 713 42. A. Donneys, N. S. Nelson, E. E. Page, S. S. Deshpande, P. A. Felice, C. N. Tchanque-Fossuo, J. P.  
714 Spiegel, S. R. Buchman, Targeting angiogenesis as a therapeutic means to reinforce osteocyte  
715 survival and prevent nonunions in the aftermath of radiotherapy. *Head Neck* **37**, 1261-1267 (2015).
- 716 43. A. Donneys, N. S. Nelson, J. E. Perosky, Y. Polyatskaya, J. J. Rodriguez, C. Figueredo, C. A.  
717 Vasseli, H. C. Ratliff, S. S. Deshpande, K. M. Kozloff, S. R. Buchman, Prevention of radiation-  
718 induced bone pathology through combined pharmacologic cytoprotection and angiogenic  
719 stimulation. *Bone* **84**, 245-252 (2016).
- 720 44. A. S. Farberg, X. L. Jing, L. A. Monson, A. Donneys, C. N. Tchanque-Fossuo, S. S. Deshpande, S.  
721 R. Buchman, Deferoxamine reverses radiation induced hypovascularity during bone regeneration  
722 and repair in the murine mandible. *Bone* **50**, 1184-1187 (2012).
- 723 45. P. A. Felice, S. Ahsan, A. Donneys, S. S. Deshpande, N. S. Nelson, S. R. Buchman, Deferoxamine  
724 administration delivers translational optimization of distraction osteogenesis in the irradiated  
725 mandible. *Plast Reconstr Surg* **132**, 542e-548e (2013).
- 726 46. K. M. Urlaub, J. V. Lynn, E. G. Carey, N. S. Nelson, Y. Polyatskaya, A. Donneys, A. C. Mazzoli,  
727 S. R. Buchman, Histologic Improvements in Irradiated Bone Through Pharmaceutical Intervention  
728 in Mandibular Distraction Osteogenesis. *J Oral Maxillofac Surg* **76**, 2660-2668 (2018).
- 729 47. S. Guzey, A. Aykan, S. Ozturk, H. Avsever, Y. Karslioglu, A. Ertan, The Effects of Desferrioxamine  
730 on Bone and Bone Graft Healing in Critical-Size Bone Defects. *Ann Plast Surg* **77**, 560-568 (2016).
- 731 48. R. Stewart, J. Goldstein, A. Eberhardt, G. T. Chu, S. Gilbert, Increasing vascularity to improve  
732 healing of a segmental defect of the rat femur. *J Orthop Trauma* **25**, 472-476 (2011).
- 733 49. B. S. Grewal, B. Keller, P. Weinhold, L. E. Dahners, Evaluating effects of deferoxamine in a rat  
734 tibia critical bone defect model. *J Orthop* **11**, 5-9 (2014).
- 735 50. T. Matsumoto, S. Sato, Stimulating angiogenesis mitigates the unloading-induced reduction in  
736 osteogenesis in early-stage bone repair in rats. *Physiological reports* **3**, (2015).
- 737 51. P. Jia, H. Chen, H. Kang, J. Qi, P. Zhao, M. Jiang, L. Guo, Q. Zhou, N. D. Qian, H. B. Zhou, Y. J.  
738 Xu, Y. Fan, L. F. Deng, Deferoxamine released from poly(lactic-co-glycolic acid) promotes healing  
739 of osteoporotic bone defect via enhanced angiogenesis and osteogenesis. **104**, 2515-2527 (2016).
- 740 52. X. Shen, C. Wan, G. Ramaswamy, M. Mavalli, Y. Wang, C. L. Duvall, L. F. Deng, R. E. Guldborg,  
741 A. Eberhart, T. L. Clemens, S. R. Gilbert, Prolyl hydroxylase inhibitors increase neoangiogenesis  
742 and callus formation following femur fracture in mice. *J Orthop Res* **27**, 1298-1305 (2009).
- 743 53. W. Zhang, G. Li, R. Deng, L. Deng, S. Qiu, New bone formation in a true bone ceramic scaffold  
744 loaded with desferrioxamine in the treatment of segmental bone defect: a preliminary study. *J*  
745 *Orthop Sci* **17**, 289-298 (2012).
- 746 54. J. Drager, J. L. Ramirez-GarciaLuna, A. Kumar, U. Gbureck, E. J. Harvey, J. E. Barralet, (\*)  
747 Hypoxia Biomimicry to Enhance Monetite Bone Defect Repair. *Tissue Eng Part A* **23**, 1372-1381  
748 (2017).

- 749 55. M. Hahne, P. Schumann, M. Mursell, C. Strehl, P. Hoff, F. Buttgereit, T. Gaber, Unraveling the  
750 role of hypoxia-inducible factor (HIF)-1 $\alpha$  and HIF-2 $\alpha$  in the adaption process of human  
751 microvascular endothelial cells (HMEC-1) to hypoxia: Redundant HIF-dependent regulation of  
752 macrophage migration inhibitory factor. *Microvasc Res* **116**, 34-44 (2018).
- 753 56. A. Lang, M. Kirchner, J. Stefanowski, M. Durst, M. C. Weber, M. Pfeiffenberger, A. Damerau, A.  
754 E. Hauser, P. Hoff, G. N. Duda, F. Buttgereit, K. Schmidt-Bleek, T. Gaber, Collagen I-based  
755 scaffolds negatively impact fracture healing in a mouse-osteotomy-model although used routinely  
756 in research and clinical application. *Acta Biomater* **86**, 171-184 (2019).
- 757 57. J. Stefanowski, A. Lang, A. Rauch, L. Aulich, M. Köhler, A. F. Fiedler, F. Buttgereit, K. Schmidt-  
758 Bleek, G. N. Duda, T. Gaber, R. A. Niesner, A. E. Hauser, Spatial Distribution of Macrophages  
759 During Callus Formation and Maturation Reveals Close Crosstalk Between Macrophages and  
760 Newly Forming Vessels. *Frontiers in Immunology* **10**, (2019).
- 761 58. J. How, J. R. Brown, S. Saylor, D. L. Rimm, Macrophage expression of tartrate-resistant acid  
762 phosphatase as a prognostic indicator in colon cancer. *Histochemistry and cell biology* **142**, 195-  
763 204 (2014).
- 764 59. C. H. Bucher, C. Schlundt, D. Wulsten, F. A. Sass, S. Wendler, A. Ellinghaus, T. Thiele, R.  
765 Seemann, B. M. Willie, H. D. Volk, G. N. Duda, K. Schmidt-Bleek, Experience in the Adaptive  
766 Immunity Impacts Bone Homeostasis, Remodeling, and Healing. *Front Immunol* **10**, 797 (2019).
- 767 60. K. Licha, P. Welker, M. Weinhart, N. Wegner, S. Kern, S. Reichert, I. Gemeinhardt, C. Weissbach,  
768 B. Ebert, R. Haag, M. Schirner, Fluorescence Imaging with Multifunctional Polyglycerol Sulfates:  
769 Novel Polymeric near-IR Probes Targeting Inflammation. *Bioconjugate Chemistry* **22**, 2453-2460  
770 (2011).
- 771 61. T. Schneider, P. Welker, K. Licha, R. Haag, G. Schulze-Tanzil, Influence of dendritic polyglycerol  
772 sulfates on knee osteoarthritis: an experimental study in the rat osteoarthritis model. *BMC*  
773 *Musculoskeletal Disorders* **16**, 387 (2015).
- 774 62. H. Türk, R. Haag, S. Alban, Dendritic Polyglycerol Sulfates as New Heparin Analogues and Potent  
775 Inhibitors of the Complement System. *Bioconjugate Chemistry* **15**, 162-167 (2004).
- 776 63. E. A. Barcak, M. J. Beebe, Bone Morphogenetic Protein: Is There Still a Role in Orthopedic Trauma  
777 in 2017? *Orthop Clin North Am* **48**, 301-309 (2017).
- 778 64. R. K. Hernandez, T. P. Do, C. W. Critchlow, R. E. Dent, S. S. Jick, Patient-related risk factors for  
779 fracture-healing complications in the United Kingdom General Practice Research Database. *Acta*  
780 *Orthop* **83**, 653-660 (2012).
- 781 65. Y. Hachemi, A. E. Rapp, A.-K. Picke, G. Weidinger, A. Ignatius, J. Tuckermann, Molecular  
782 mechanisms of glucocorticoids on skeleton and bone regeneration after fracture. *Journal of*  
783 *molecular endocrinology* **61**, R75-R90 (2018).
- 784 66. I. Carcamo-Orive, A. Gaztelumendi, J. Delgado, N. Tejados, A. Dorronsoro, J. Fernandez-Rueda,  
785 D. J. Pennington, C. Trigueros, Regulation of human bone marrow stromal cell proliferation and  
786 differentiation capacity by glucocorticoid receptor and AP-1 crosstalk. *J Bone Miner Res* **25**, 2115-  
787 2125 (2010).
- 788 67. P. L. Chang, H. C. Blair, X. Zhao, Y. W. Chien, D. Chen, A. B. Tilden, Z. Chang, X. Cao, O. M.  
789 Faye-Petersen, P. Hicks, Comparison of fetal and adult marrow stromal cells in osteogenesis with  
790 and without glucocorticoids. *Connect Tissue Res* **47**, 67-76 (2006).
- 791 68. C. D. Hoemann, H. El-Gabalawy, M. D. McKee, In vitro osteogenesis assays: influence of the  
792 primary cell source on alkaline phosphatase activity and mineralization. *Pathol Biol (Paris)* **57**,  
793 318-323 (2009).
- 794 69. I. H. Song, A. I. Caplan, J. E. Dennis, In vitro dexamethasone pretreatment enhances bone formation  
795 of human mesenchymal stem cells in vivo. *J Orthop Res* **27**, 916-921 (2009).
- 796 70. G. Tan, P. D. Kang, F. X. Pei, Glucocorticoids affect the metabolism of bone marrow stromal cells  
797 and lead to osteonecrosis of the femoral head: a review. *Chin Med J (Engl)* **125**, 134-139 (2012).
- 798 71. S. Walsh, G. R. Jordan, C. Jefferiss, K. Stewart, J. N. Beresford, High concentrations of  
799 dexamethasone suppress the proliferation but not the differentiation or further maturation of human

- 800 osteoblast precursors in vitro: relevance to glucocorticoid-induced osteoporosis. *Rheumatology*  
801 (*Oxford*) **40**, 74-83 (2001).
- 802 72. Z. H. Qu, X. L. Zhang, T. T. Tang, K. R. Dai, Promotion of osteogenesis through beta-catenin  
803 signaling by desferrioxamine. *Biochem Biophys Res Commun* **370**, 332-337 (2008).
- 804 73. X. Yu, Q. Wan, G. Cheng, X. Cheng, J. Zhang, J. L. Pathak, Z. Li, CoCl<sub>2</sub>, a mimic of hypoxia,  
805 enhances bone marrow mesenchymal stem cells migration and osteogenic differentiation via  
806 STAT3 signaling pathway. *Cell Biol Int* **42**, 1321-1329 (2018).
- 807 74. M. Winner, A. C. Koong, B. E. Rendon, W. Zundel, R. A. Mitchell, Amplification of tumor hypoxic  
808 responses by macrophage migration inhibitory factor-dependent hypoxia-inducible factor  
809 stabilization. *Cancer Res* **67**, 186-193 (2007).
- 810 75. J. Drager, Z. Sheikh, Y. L. Zhang, E. J. Harvey, J. E. Barralet, Local delivery of iron chelators  
811 reduces in vivo remodeling of a calcium phosphate bone graft substitute. *Acta Biomater* **42**, 411-  
812 419 (2016).
- 813 76. B. P. Hertzberg, J. B. Holt, R. D. Graff, S. R. Gilbert, L. E. Dahners, An evaluation of carrier agents  
814 for desferoxamine, an up-regulator of vascular endothelial growth factor. *J Biomater Appl* **27**, 1046-  
815 1054 (2013).
- 816 77. Q. Yao, Y. Liu, J. Tao, K. M. Baumgarten, H. Sun, Hypoxia-Mimicking Nanofibrous Scaffolds  
817 Promote Endogenous Bone Regeneration. *ACS Appl Mater Interfaces* **8**, 32450-32459 (2016).
- 818 78. S. Onodera, J. Nishihira, M. Yamazaki, T. Ishibashi, A. Minami, Increased expression of  
819 macrophage migration inhibitory factor during fracture healing in rats. *Histochem Cell Biol* **121**,  
820 209-217 (2004).
- 821 79. S. C. Gilliver, E. Emmerson, J. Bernhagen, M. J. Hardman, MIF: a key player in cutaneous biology  
822 and wound healing. *Exp Dermatol* **20**, 1-6 (2011).
- 823 80. T. Kobayashi, S. Onodera, E. Kondo, H. Tohyama, H. Fujiki, A. Yokoyama, K. Yasuda, Impaired  
824 fracture healing in macrophage migration inhibitory factor-deficient mice. *Osteoporos Int* **22**, 1955-  
825 1965 (2011).
- 826 81. A. P. Kusumbe, S. K. Ramasamy, R. H. Adams, Coupling of angiogenesis and osteogenesis by a  
827 specific vessel subtype in bone. *Nature* **507**, 323-328 (2014).
- 828 82. S. K. Ramasamy, A. P. Kusumbe, L. Wang, R. H. Adams, Endothelial Notch activity promotes  
829 angiogenesis and osteogenesis in bone. *Nature* **507**, 376-380 (2014).
- 830 83. R. Gu, L. L. Santos, D. Ngo, H. Fan, P. P. Singh, G. Fingerle-Rowson, R. Bucala, J. Xu, J. M.  
831 Quinn, E. F. Morand, Macrophage migration inhibitory factor is essential for osteoclastogenic  
832 mechanisms in vitro and in vivo mouse model of arthritis. *Cytokine* **72**, 135-145 (2015).
- 833 84. S. H. Mun, H. Y. Won, P. Hernandez, H. L. Aguila, S. K. Lee, Deletion of CD74, a putative MIF  
834 receptor, in mice enhances osteoclastogenesis and decreases bone mass. *J Bone Miner Res* **28**, 948-  
835 959 (2013).
- 836 85. L. Zheng, J. Gao, K. Jin, Z. Chen, W. Yu, K. Zhu, W. Huang, F. Liu, L. Mei, C. Lou, D. He,  
837 Macrophage migration inhibitory factor (MIF) inhibitor 4-IPP suppresses osteoclast formation and  
838 promotes osteoblast differentiation through the inhibition of the NF-kappaB signaling pathway.  
839 *Faseb j*, fj201802364RR (2019).
- 840 86. R. P. Pirraco, R. L. Reis, A. P. Marques, Effect of monocytes/macrophages on the early osteogenic  
841 differentiation of hBMSCs. *J Tissue Eng Regen Med* **7**, 392-400 (2013).
- 842 87. L. J. Raggatt, M. E. Wullschleger, K. A. Alexander, A. C. Wu, S. M. Millard, S. Kaur, M. L.  
843 Maugham, L. S. Gregory, R. Steck, A. R. Pettit, Fracture healing via periosteal callus formation  
844 requires macrophages for both initiation and progression of early endochondral ossification. *Am J*  
845 *Pathol* **184**, 3192-3204 (2014).
- 846 88. X. Bai, M. Gao, S. Syed, J. Zhuang, X. Xu, X.-Q. Zhang, Bioactive hydrogels for bone regeneration.  
847 *Bioactive materials* **3**, 401-417 (2018).
- 848 89. N. Y. Naung, S. Suttapreyasri, S. Kamolmatyakul, T. Nuntanaranont, Comparative study of  
849 different centrifugation protocols for a density gradient separation media in isolation of



- 850 osteoprogenitors from bone marrow aspirate. *Journal of oral biology and craniofacial research* **4**,  
851 160-168 (2014).
- 852 90. H. Li, R. Ghazanfari, D. Zacharaki, H. C. Lim, S. Scheduling, Isolation and characterization of  
853 primary bone marrow mesenchymal stromal cells. *Ann NY Acad Sci* **1370**, 109-118 (2016).
- 854 91. A. Papadimitropoulos, E. Piccinini, S. Brachat, A. Braccini, D. Wendt, A. Barbero, C. Jacobi, I.  
855 Martin, Expansion of human mesenchymal stromal cells from fresh bone marrow in a 3D scaffold-  
856 based system under direct perfusion. *PLoS One* **9**, e102359 (2014).
- 857 92. Y. Zhou, H. Chen, H. Li, Y. Wu, 3D culture increases pluripotent gene expression in mesenchymal  
858 stem cells through relaxation of cytoskeleton tension. *Journal of cellular and molecular medicine*  
859 **21**, 1073-1084 (2017).
- 860 93. H. Oshina, S. Sotome, T. Yoshii, I. Torigoe, Y. Sugata, H. Maehara, E. Marukawa, K. Omura, K.  
861 Shinomiya, Effects of continuous dexamethasone treatment on differentiation capabilities of bone  
862 marrow-derived mesenchymal cells. *Bone* **41**, 575-583 (2007).
- 863 94. P. S. Gomes, M. H. Fernandes, Rodent models in bone-related research: the relevance of calvarial  
864 defects in the assessment of bone regeneration strategies. *Lab Anim* **45**, 14-24 (2011).
- 865 95. M. Peric, I. Dumic-Cule, D. Grcevic, M. Matijasic, D. Verbanac, R. Paul, L. Grgurevic, V. Trkulja,  
866 C. M. Bagi, S. Vukicevic, The rational use of animal models in the evaluation of novel bone  
867 regenerative therapies. *Bone* **70**, 73-86 (2015).
- 868 96. M. Mehta, H. Schell, C. Schwarz, A. Peters, K. Schmidt-Bleek, A. Ellinghaus, H. J. Bail, G. N.  
869 Duda, J. Lienau, A 5-mm femoral defect in female but not in male rats leads to a reproducible  
870 atrophic non-union. *Arch Orthop Trauma Surg* **131**, 121-129 (2011).
- 871 97. T. Gaber, A. C. K. Brinkman, J. Pienczikowski, K. Diesing, A. Damerau, M. Pfeiffenberger, A.  
872 Lang, S. Ohrndorf, G. R. Burmester, F. Buttgerit, P. Hoff, Impact of Janus Kinase Inhibition with  
873 Tofacitinib on Fundamental Processes of Bone Healing. *Int J Mol Sci* **21**, (2020).
- 874 98. P. Jirkof, M. Durst, R. Klopfleisch, R. Palme, C. Thone-Reineke, F. Buttgerit, K. Schmidt-Bleek,  
875 A. Lang, Administration of Tramadol or Buprenorphine via the drinking water for post-operative  
876 analgesia in a mouse-osteotomy model. *Sci Rep* **9**, DOI: 10.1038/s41598-41019-47186-41595  
877 (2019).
- 878 99. A. Lang, A. Schulz, A. Ellinghaus, K. Schmidt-Bleek, Osteotomy models - the current status on  
879 pain scoring and management in small rodents. *Lab Anim* **50**, 433-441 (2016).
- 880 100. M. L. Bouxsein, S. K. Boyd, B. A. Christiansen, R. E. Guldborg, K. J. Jepsen, R. Muller, Guidelines  
881 for assessment of bone microstructure in rodents using micro-computed tomography. *J Bone Miner*  
882 *Res* **25**, 1468-1486 (2010).
- 883 101. T. Kawamoto, K. Kawamoto, Preparation of thin frozen sections from nonfixed and undecalcified  
884 hard tissues using Kawamoto's film method (2012). *Methods Mol Biol* **1130**, 149-164 (2014).
- 885 102. C. Schlundt, T. El Khassawna, A. Serra, A. Dienelt, S. Wendler, H. Schell, N. van Rooijen, A.  
886 Radbruch, R. Lucius, S. Hartmann, G. N. Duda, K. Schmidt-Bleek, Macrophages in bone fracture  
887 healing: Their essential role in endochondral ossification. *Bone* **106**, 78-89 (2015).
- 888 103. J. Fielding, M. Brunstroem, ESTIMATION OF FERROXAMINE AND DESFERROXAMINE  
889 IN URINE. *J Clin Pathol* **17**, 395-398 (1964).
- 890 104. S. Hemmati-Sadeghi, P. Dey, J. Ringe, R. Haag, M. Sittinger, T. Dehne, Biomimetic sulfated  
891 polyethylene glycol hydrogel inhibits proteoglycan loss and tumor necrosis factor- $\alpha$ -induced  
892 expression pattern in an osteoarthritis in vitro model. *Journal of Biomedical Materials Research*  
893 *Part B: Applied Biomaterials* **107**, 490-500 (2019).
- 894 105. M. Wagegg, T. Gaber, F. L. Lohanatha, M. Hahne, C. Strehl, M. Fangradt, C. L. Tran, K.  
895 Schonbeck, P. Hoff, A. Ode, C. Perka, G. N. Duda, F. Buttgerit, Hypoxia promotes osteogenesis  
896 but suppresses adipogenesis of human mesenchymal stromal cells in a hypoxia-inducible factor-1  
897 dependent manner. *PLoS One* **7**, e46483 (2012).

899           **Acknowledgments:** The authors would like to thank Gabriela May, Manuela Jakstadt, Gabriela  
900 Korus, Marie-Christin Weber and Mario Thiele for excellent technical assistance. Additionally, we like to  
901 acknowledge Peter Schlattmann (University of Jena, Germany) for supporting logistic regression analysis.  
902 Moreover, Anastasia Rakow and Paul Simon served as orthopedic expert team to re-analyze the cases  
903 included in the retrospective study. FACS analyses were performed together with the Core Facility at the  
904 German Rheumatism Research Centre. Bone-marrow was provided from the “Tissue Harvesting” Core  
905 Facility of the BCRT. This study is a part of Annemarie Lang’s PhD thesis as published under  
906 <https://refubium.fu-berlin.de/handle/fub188/26365>. The retrospective study was performed within the  
907 doctoral dissertation of Sara Fügner (now Helfmeier) - [https://refubium.fu-](https://refubium.fu-berlin.de/handle/fub188/3611?show=full)  
908 [berlin.de/handle/fub188/3611?show=full](https://refubium.fu-berlin.de/handle/fub188/3611?show=full). **Funding:** This study was financially supported by the Berlin  
909 Brandenburg Center for Regenerative Therapies (BCRT) and the Berlin Brandenburg School for  
910 Regenerative Therapies (BSRT). The work of Timo Gaber was funded by the Deutsche  
911 Forschungsgemeinschaft (DFG; no. 353142848). Some data were taken during a refinement study on the  
912 pain management in the mouse osteotomy model that was financed by the federal ministry for risk  
913 assessment (BfR and Bf3R) in Berlin (“RefineMOMo”; 1328-542). The work of Anja E. Hauser was funded  
914 by DFG FOR2165 (HA5354/6-2 to A.E.H.). **Author contributions:** : K.S.B., G.N.D., M.L., T.G. and F.B.  
915 conceived and supervised the research. S.H., A.L., P.H., C.P. and F.B. designed the retrospective study,  
916 performed data collection and quality control and performed analysis. A.L., K.S.B. and T.G. designed and  
917 performed in vitro and animal experiments. A.L., J.S., A.K., V.S., A.W. A.D. and M.P. performed analysis.  
918 A.L., T.G., J.R., S.H.-S., R.H. planned, supervised or performed release assays. A.L., F.B., T.G. and K.S.B.  
919 wrote the paper. A.E.H., G.N.D. and M. L. revised manuscript. **Competing interests:** Authors confirm no  
920 competing interest. **Data and materials availability:** All data associated with this study are present in the  
921 paper or the Supplementary Materials.

922

923

924

## Supplementary Materials

925

### 1. Retrospective study - Detailed information and additional data

927

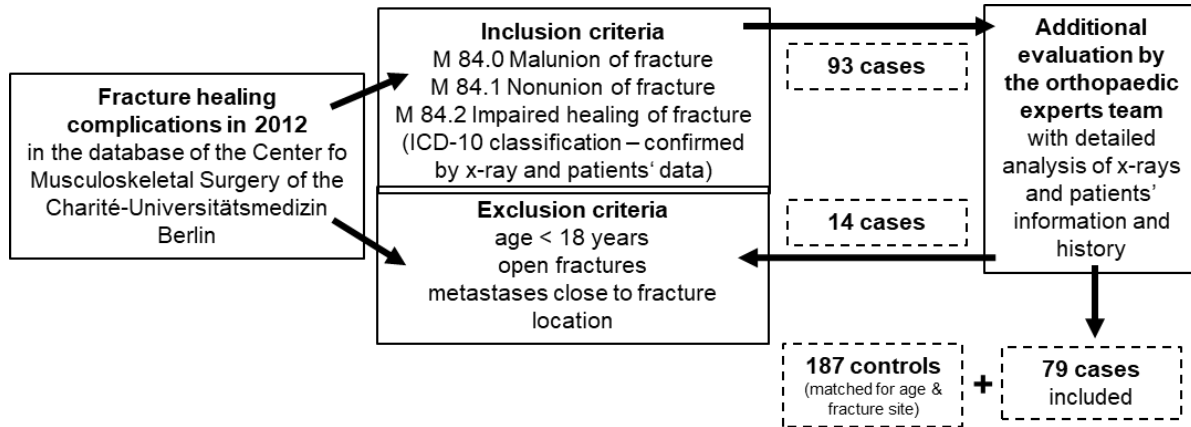

928

929 *Figure S6: Search strategy of the retrospective study including inclusion and exclusion criteria.*

930

931 *Table S1: Detailed characterization of the 79 included cases.*

|                              | Total number | in % |
|------------------------------|--------------|------|
| <b>ICD-10 classification</b> |              |      |
| M 84.0                       | 12           | 15.2 |
| M 84.1                       | 61           | 77.2 |
| M 84.2                       | 6            | 7.6  |
| <b>Fracture localisation</b> |              |      |
| Humerus                      | 15           | 19.0 |
| Radius, ulna                 | 12           | 15.2 |
| Femur                        | 20           | 25.3 |
| Tibia, fibula                | 11           | 13.9 |
| Clavicle                     | 7            | 8.9  |
| Scaphoid                     | 5            | 6.3  |
| Vertebrae                    | 4            | 5.1  |
| Os sacrum                    | 1            | 1.3  |
| Patella                      | 1            | 1.3  |
| Metatarsal                   | 3            | 3.8  |

932

933 **Table S2: Descriptive analysis.**

|                              | Controls in % | Cases in % |
|------------------------------|---------------|------------|
| <b>Age</b>                   |               |            |
| 18 - 39                      | 26.2          | 30.4       |
| 40 - 59                      | 36.9          | 34.2       |
| > 60                         | 36.9          | 35.4       |
| <b>Gender</b>                |               |            |
| male                         | 44.9          | 53.2       |
| female                       | 55.1          | 46.8       |
| <b>BMI</b>                   |               |            |
| < 20                         | 9.9           | 6.5        |
| 20 - 25                      | 40.7          | 41.6       |
| > 25                         | 49.4          | 51.9       |
| <b>Alcohol abuse</b>         |               |            |
| no                           | 85.6          | 97.3       |
| yes                          | 14.4          | 2.7        |
| <b>Smoking</b>               |               |            |
| no                           | 71.9          | 62.2       |
| yes                          | 28.1          | 37.8       |
| <b>Glucocorticoids</b>       |               |            |
| no                           | 97.3          | 93.7       |
| continuously                 | 1.6           | 6.3        |
| temporarily                  | 1.1           | 0          |
| <b>NSAIDs</b>                |               |            |
| no                           | 84.5          | 86.1       |
| continuously                 | 2.7           | 7.6        |
| ASS-100 mg                   | 12.8          | 6.3        |
| <b>Rheumatoid Arthritis</b>  |               |            |
| no                           | 99.5          | 93.7       |
| yes                          | 0.5           | 6.3        |
| <b>Osteoporosis</b>          |               |            |
| no                           | 90.8          | 89.9       |
| yes                          | 9.5           | 10.1       |
| <b>Arterial Hypertension</b> |               |            |
| no                           | 66.5          | 57.0       |
| yes                          | 33.5          | 43.0       |
| <b>Diabetes Type 2</b>       |               |            |
| no                           | 88.1          | 88.6       |
| yes                          | 11.9          | 11.4       |

934

935

936 **2. Systematic literature review – Search strategy**

937

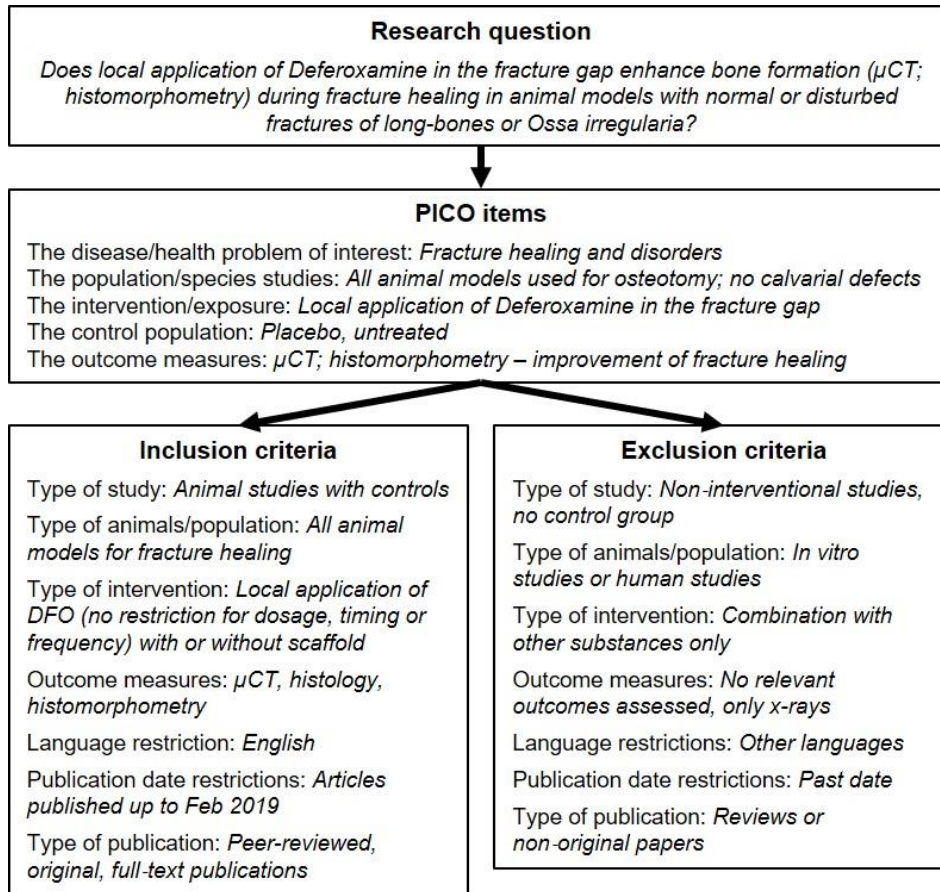

938

939 **Figure S7: Search strategy of the systematic literature review in accordance with the PRISMA**  
940 **guidelines and recommendations from Syrf and Syrcle.**

941

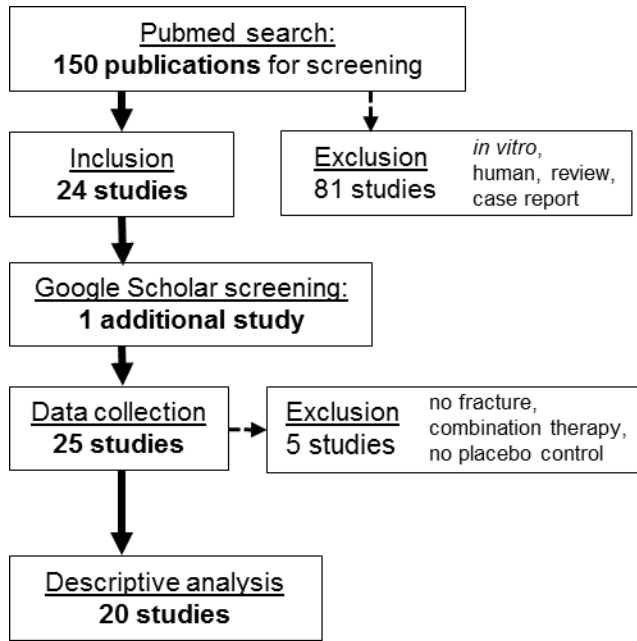

942  
943 **Figure S8: Flow diagram of the systematic literature review resulting in the inclusion of 20 studies.**

944

### 945 **3. *In vitro* and *in vivo* studies – Additional data**

946

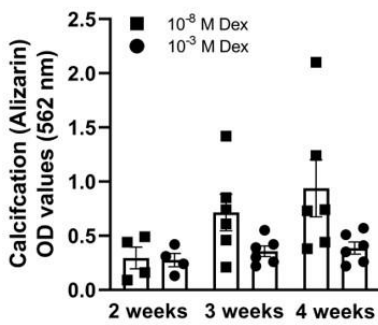

947  
948 **Figure S9: *In vitro* model pre-testing.** Determination of the conditions and testing period of the  
949 calcification assay for further titration experiments under normoxic conditions ( $N = 4-6$ ; > triplicates). Bar  
950 graphs show mean  $\pm$  SEM and individual data points.

951

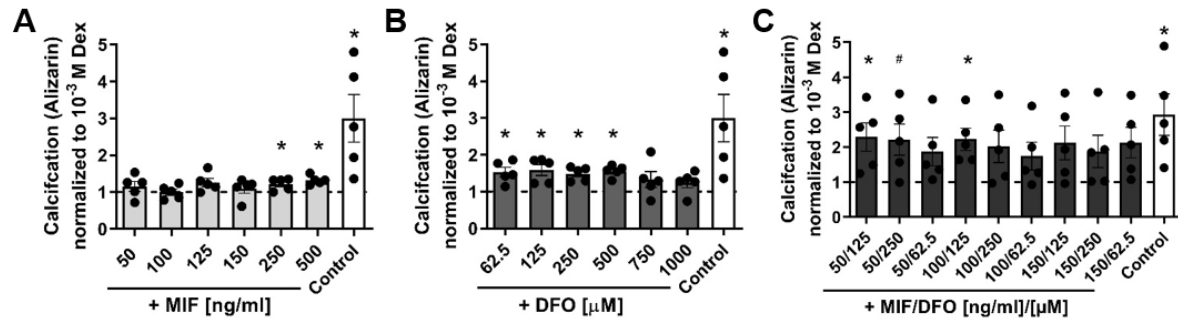

952

953 **Figure S10: Titration of different MIF and DFO concentrations alone (A, B) and in combination (C).**  
954 *hMSCs were cultivated under normoxia for 4 weeks with addition of osteogenic medium (OM). OD values*  
955 *gained after Alizarin red staining were normalized to Dex 10<sup>-3</sup> M (N = 4-6; > triplicates). Bar graphs show*  
956 *mean ± SEM and individual data points. One sample t-test was used to determine statistical significance*  
957 *towards the hypothetical value of 1. p-values are indicated with #P < 0.07; \*P < 0.05.*



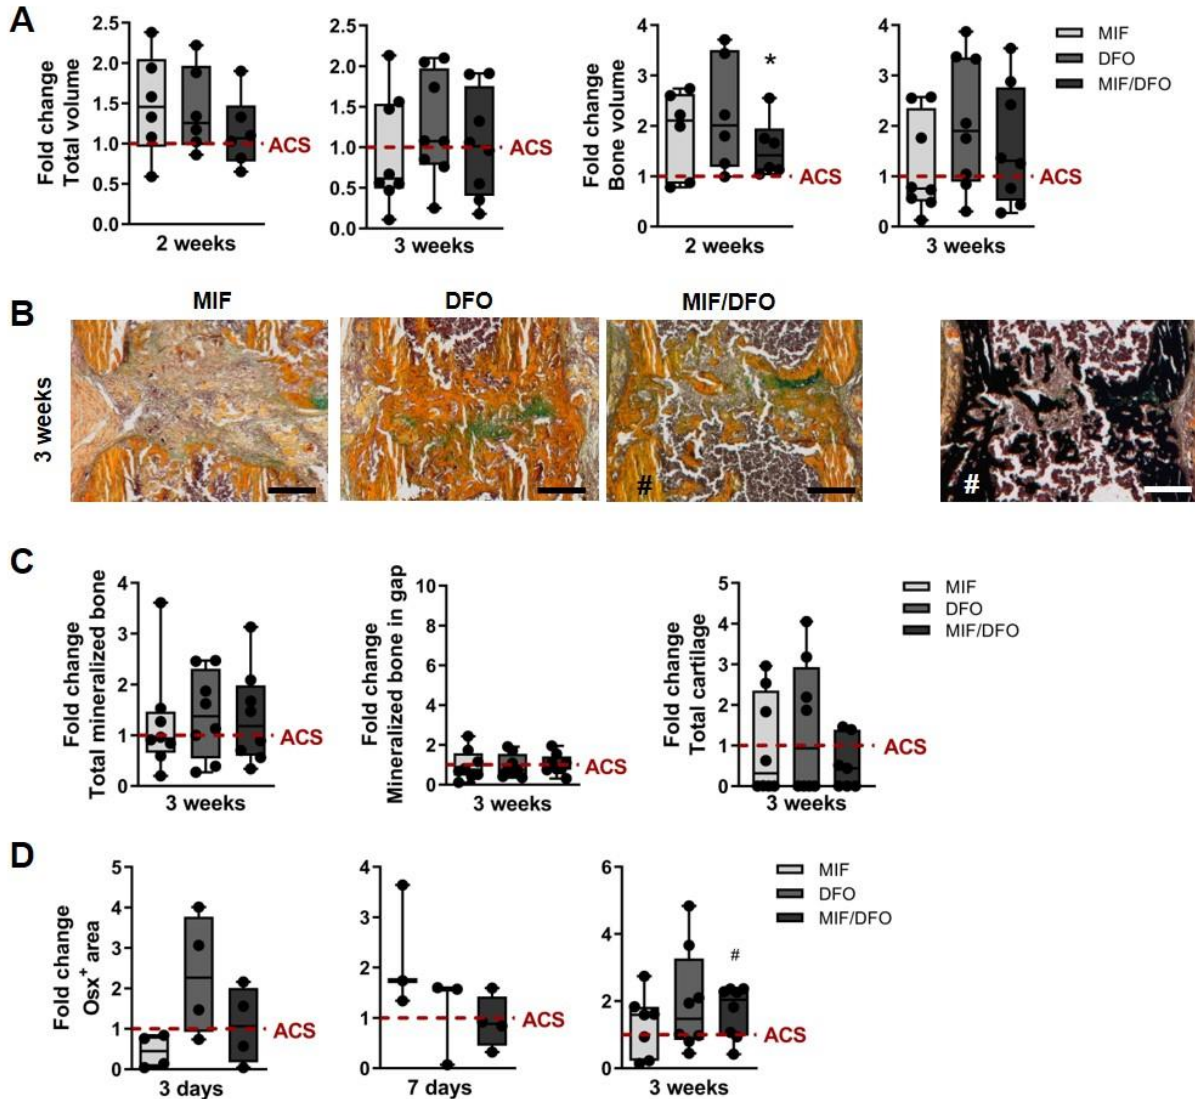

958

959 **Figure S11: Bone regeneration in a delayed healing model after single dose of MIF or/and DFO –**  
 960 **additional data.** (A) MicroCT quantification of total volume and bone volume at 2 weeks  
 961 post-osteotomy normalized to the median of the ACS group (indicated as dotted line = 1). (B) Representative  
 962 images of Movat's pentachrome staining for each treatment group. yellow- mineralized bone/scaffold;  
 963 green – cartilage; magenta – bone marrow. Representative images for #MIF/DFO, 3 weeks of von Kossa  
 964 combined with Movat's pentachrome staining to show the distinction between mineralized bone and  
 965 residual scaffold. (C) Histomorphometry of Movat's pentachrome staining using ImageJ. Data were  
 966 normalized to the median of the ACS group (indicated as dotted line = 1). (D) Quantification of Osx  
 967 staining at 3, 7 days and 3 weeks. Data are shown as box plots with the median as horizontal line, interquartile  
 968 range as boxes, minimum/maximum as whiskers and individual data points. Wilcoxon signed rank test was  
 969 applied to determine difference against the ACS control group (hypothetical value = 1) and Kruskal Wallis  
 970 test with Dunn's multiple comparison test was used to compare groups. #P < 0.07; \*P < 0.05.

971



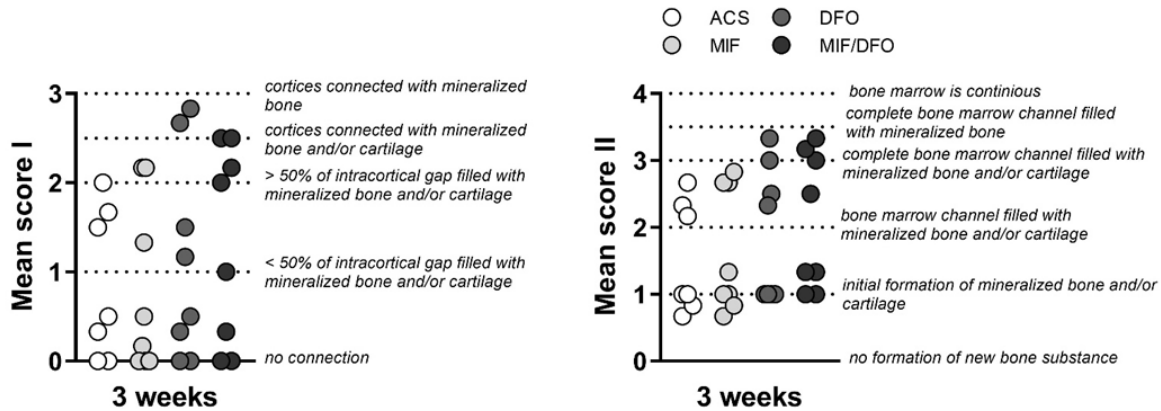

972

973 **Figure S12: Results of two qualitative scores** that were performed with all slides (Movat's pentachrome  
 974 staining) by 3 independent experimenters. Score criteria are specified in the graphs. Mean score I focused  
 975 in the intracortical area indicating a bridging between the cortices. Mean score II focus in the filling of the  
 976 fracture gap/ bone marrow area between cortices. The qualitative score was aimed to underline subjective  
 977 findings and the quantification via histomorphometry.

978

979

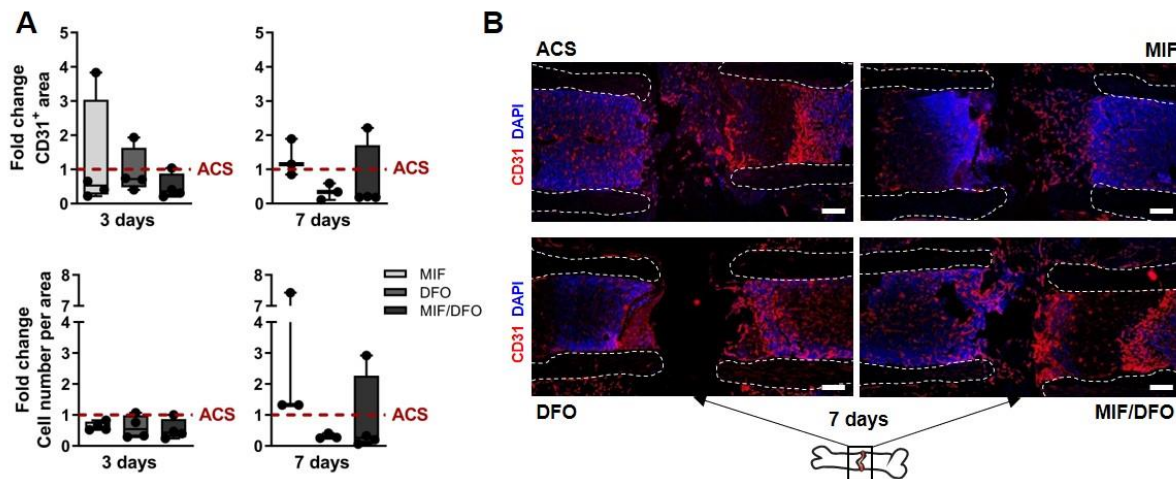

980

981 **Figure S13: Revascularization in a delayed healing model under MIF, DFO and MIF/DFO treatment –**  
 982 **additional data.** (A) Quantification CD31<sup>+</sup> stained areas and cell numbers per area normalized to the  
 983 median of the ACS group (indicated as dotted line = 1) and (B) corresponding representative images for  
 984 day 3 and 7 (N = 3-4). White dotted lines indicate cortices. Schematic bone indicates alignment of images.  
 985 Scale bars = 200µm. Data are shown as box plots with the median as horizontal line, interquartile range  
 986 as boxes, minimum/maximum as whiskers and individual data points. Wilcoxon signed rank test was applied  
 987 to determine difference against the ACS control group (hypothetical value = 1) and Kruskal Wallis test with  
 988 Dunn's multiple comparison test was used to compare groups.

989

990

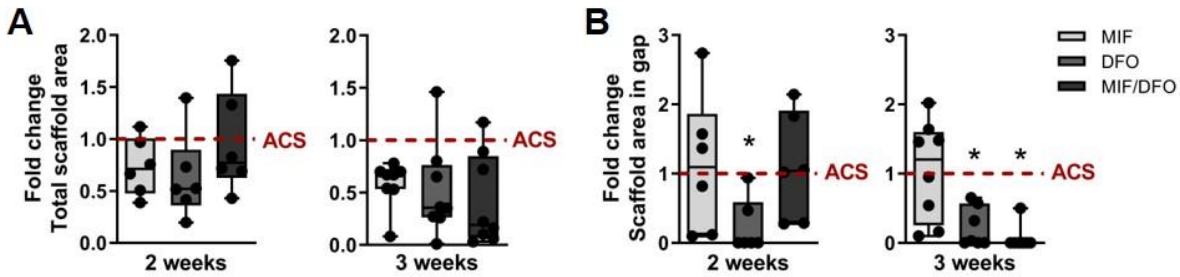

991

992 **Figure S14: Presence of F4/80+ macrophages and TRAP+ cells within the fracture gap – additional data.**  
 993 (A) Quantified total scaffold areas and (B) in the gap after 2 and 3 weeks normalized to the median of the  
 994 ACS group (indicated as dotted line = 1). (N = 6-8). Data are shown as box plots with the median as  
 995 horizontal line, interquartile range as boxes, minimum/maximum as whiskers and individual data points.  
 996 Wilcoxon signed rank test was applied to determine difference against the ACS control group (hypothetical  
 997 value = 1) and Kruskal Wallis test with Dunn's multiple comparison test was used to compare groups. \*P  
 998 < 0.05.

999

1000 **Table S3: List of hMSCs that were used in the study.**

| Donor | Age | Gender | Cultivation condition                                                                                                                                                                      | Characterization                                                 | Experiments             |
|-------|-----|--------|--------------------------------------------------------------------------------------------------------------------------------------------------------------------------------------------|------------------------------------------------------------------|-------------------------|
| 1     | 52  | female |                                                                                                                                                                                            |                                                                  |                         |
| 2     | 77  | female |                                                                                                                                                                                            |                                                                  |                         |
| 3     | 70  | female | Expansion in normal medium:<br>DMEM plus GlutaMAX, 10% FCS,<br>1% Penicillin-Streptomycin                                                                                                  |                                                                  |                         |
| 4     | 76  | male   |                                                                                                                                                                                            |                                                                  |                         |
| 5     | 73  | female |                                                                                                                                                                                            |                                                                  |                         |
| 6     | 69  | female | Osteogenic medium:<br>DMEM plus GlutaMAX, 10% FCS,<br>1% Penicillin-Streptomycin,<br>10 mM β-glycerophosphate,<br>10 <sup>-8</sup> M dexamethasone, 0.1 mM L-<br>ascorbic acid-2-phosphate |                                                                  | MIF/DFO titration       |
| 7     | 48  | male   |                                                                                                                                                                                            |                                                                  |                         |
| 8     | 75  | female |                                                                                                                                                                                            |                                                                  |                         |
| 9     | 82  | male   |                                                                                                                                                                                            |                                                                  |                         |
| 10    | 56  | female |                                                                                                                                                                                            |                                                                  |                         |
| 11    | 66  | male   |                                                                                                                                                                                            | + plastic adherent<br>+ osteogenic/adipogenic<br>differentiation |                         |
| 12    | 69  | female |                                                                                                                                                                                            | + CD13, CD44, CD90, CD105<br>- CD45, CD14, CD19                  |                         |
| 13    | 57  | male   |                                                                                                                                                                                            |                                                                  |                         |
| 14    | 84  | female | Expansion in normal medium:<br>DMEM plus GlutaMAX, 20%<br>StemMACS, 10% (v/v) FCS, 1%<br>Penicillin-Streptomycin                                                                           |                                                                  |                         |
| 15    | 65  | male   |                                                                                                                                                                                            |                                                                  |                         |
| 16    | 71  | female |                                                                                                                                                                                            |                                                                  |                         |
| 17    | 75  | female |                                                                                                                                                                                            |                                                                  | DFO release experiments |
| 19    | 78  | male   | Osteogenic medium:<br>StemMACS OsteoDiff Medium, %<br>Penicillin-Streptomycin                                                                                                              |                                                                  |                         |
| 20    | 61  | female |                                                                                                                                                                                            |                                                                  |                         |
| 21    | 63  | male   |                                                                                                                                                                                            |                                                                  |                         |
| 22    | 77  | male   |                                                                                                                                                                                            |                                                                  |                         |
| 23    | 63  | male   |                                                                                                                                                                                            |                                                                  |                         |

1001

1002

1003
